Research Article

# Massive genome reduction occurred prior to the origin of coral algal symbionts

Sarah Shah<sup>1</sup>, Katherine E. Dougan<sup>1</sup>, Yibi Chen<sup>1</sup>, Rosalyn Lo<sup>1</sup>, Gemma Laird<sup>1</sup>, Michael D. A. Fortuin<sup>1</sup>, Subash K. Rai<sup>2</sup>, Valentine Murigneux<sup>2</sup>, Anthony J. Bellantuono<sup>3</sup>, Mauricio Rodriguez-Lanetty<sup>4</sup>, Debashish Bhattacharya<sup>5,\*</sup>, Cheong Xin Chan<sup>1,\*</sup>

<sup>1</sup>The University of Queensland, School of Chemistry and Molecular Biosciences, Australian Centre for Ecogenomics, Brisbane, 4072 QLD, Australia.

<sup>2</sup>The University of Queensland, Genome Innovation Hub, Brisbane, 4072 QLD, Australia.

<sup>3</sup>Florida International University, Department of Biological Sciences, Biomolecular Science Institute, Miami, FL 33099, USA.

<sup>4</sup>Florida International University, Department of Biological Sciences, Miami, FL 33099, USA.

<sup>5</sup>Rutgers University, Department of Biochemistry and Microbiology, New Brunswick, NJ, 08901, USA

\*Corresponding authors: Debashish Bhattacharya ([d.bhattacharya@rutgers.edu](mailto:d.bhattacharya@rutgers.edu)) and Cheong Xin Chan ([c.chan1@uq.edu.au](mailto:c.chan1@uq.edu.au))

# Abstract

Dinoflagellates in the Family Symbiodiniaceae (Order Suessiales) are diverse, predominantly symbiotic lineages that associate with taxa such as corals and jellyfish. Their ancestor is believed to have been free-living, and the establishment of symbiosis (i.e., symbiogenesis) is hypothesised to have occurred multiple times during Symbiodiniaceae evolution. Among Symbiodiniaceae taxa, the genus *Effrenium* is an early diverging, free-living lineage that is phylogenetically positioned between two robustly supported groups of genera within which symbiotic taxa have emerged. The lack of symbiogenesis in *Effrenium* suggests that the ancestral features of Symbiodiniaceae may have been retained in this lineage. Here we present *de novo* assembled genomes and associated transcriptome data from three isolates of *Effrenium voratum*. We compared the *Effrenium* genomes (1.2-1.9 Gbp in size) and gene features with those of 16 Symbiodiniaceae taxa and other outgroup dinoflagellates. Surprisingly, we find that genome reduction, which is often associated with a symbiotic lifestyle, predates the origin of Symbiodiniaceae. We postulate that adaptation to an extreme habitat (e.g., as in *Polarella glacialis*) or life in oligotrophic conditions resulted in the Suessiales ancestor having a haploid genome size  $\leq 2$ Gbp, which was retained (or reduced) among all extant algae in this lineage. Nonetheless, our data reveal that the free-living lifestyle distinguishes *Effrenium* from symbiotic Symbiodiniaceae vis-à-vis their longer introns, more-extensive mRNA editing, fewer (~30%) lineage-specific gene families, and lower (~10%) level of pseudogenisation. These results demonstrate how genome reduction and the adaptation to symbiotic versus free-living lifestyles intersect, and have driven the diversification and genome evolution of Symbiodiniaceae.

# Introduction

Dinoflagellate algae in the Family Symbiodiniaceae comprise taxa that form symbioses with diverse marine organisms. Of particular importance to modern coral reefs, Symbiodiniaceae provide photosynthates *via* fixed carbon and essential nutrients to corals while resident in these cnidarians. The Symbiodiniaceae ancestor is believed to have been free-living (1) with members of this group forming symbiotic associations with corals as early as 230 million years ago (MYA) (2). Symbiogenesis, or the establishment of a symbiotic relationship between two or more taxa (3), can drastically influence lineage evolution, adaptation, and speciation as observed in obligate parasites and diverse symbiotic taxa (4-8). This phenomenon is termed the resident genome syndrome and was previously hypothesised to explain the observed patterns of Symbiodiniaceae genome evolution (9).

Based on current divergence time estimates for Symbiodiniaceae, the split between the basal genera (*Symbiodinium* and *Philozoon*) and the rest of the family occurred 166 MYA, whereas the more-recently branching symbiotic lineages diversified ~109 MYA (1). If the emergence of symbiogenesis coincides with the earliest fossil evidence from 230 MYA (2), then different Symbiodiniaceae lineages would have arose and diversified during major global geological events. These events include the switch from aragonite to calcite seas (~190 MYA; (10), the breakup of Pangea (150-230 MYA; (11), the diversification or extinction of potential hosts, e.g., the extinction of rudists 66 MYA (12, 13), and the overall change in coral morphology from the Triassic (201-252 MYA) to the Cretaceous (66-145 MYA) (14, 15). More-recent examples include the rapid radiation of the genus *Cladocopium* 4-6 MYA due to geographic isolation (16), and the co-diversification of *Symbiodinium fitti* and their coral hosts (17); see (18) for latest systematic revision of *Cladocopium* species.

As described above, symbiogenesis is expected to impact the genome evolution of symbionts to varying extents within a broad spectrum of “facultativeness” that reflects the nature of the host association (i.e., with obligate free-living and obligate symbiont at opposing extremes) and underpins evolutionary processes such as genome streamlining, genetic drift, expansion/contraction of mobile elements, pseudogenisation, gene loss, and varying mutation rates (9). Previous studies investigating the effects of symbiogenesis on Symbiodiniaceae genomes have focused almost entirely on symbiotic genera, with the polar-

dwelling, highly specialised *Polarella glacialis* (19), a sister of Symbiodiniaceae and within the same Order Suessiales, providing the only free-living outgroup.

Haploid genome sizes of Symbiodiniaceae taxa and *P. glacialis* are estimated to be < 2 Gbp, based on available sequencing data (19-22), and < 5Gbp based on DNA staining and qPCR analysis of marker sequences (23, 24). Estimates based on DNA staining are generally larger than those based on sequencing data, likely due to the permanently condensed chromosomal structures of dinoflagellates that result in overestimation of DNA content (25, 26). The diverse dinoflagellate taxa external to the Symbiodiniaceae are predominantly free-living and, in comparison, have massive genome sizes, e.g., 4.8 Gbp estimated from sequencing data for the bloom-forming *Prorocentrum cordatum* (27), and 200 Gbp based on DNA staining for *Alexandrium tamarense* (28).

Among Symbiodiniaceae taxa, *Effrenium* is the early-diverging, exclusively free-living genus. The sole species, *E. voratum*, is globally distributed in temperate and subtropical waters (1, 29). Attempts to establish a symbiotic relationship between *E. voratum* and the anemone *Exaiptasia pallida* have been unsuccessful (30, 31). Current understanding of Symbiodiniaceae evolutionary history suggests that *E. voratum* diverged 147 MYA from the basal, largely symbiotic genera of *Symbiodinium* and *Philozoon*, and prior to the other later-diverging symbiotic genera (1). Whereas genomes of other free-living species such as *Symbiodinium natans* (32) have been generated, these taxa belong to genera that also include symbiotic species and thus might have experienced a symbiotic lifestyle at some point in their history. We expect the genus *Effrenium* to have remained unaffected by the influence of symbiogenesis, and thus retain the ancestral free-living lifestyle (and genome features) of Symbiodiniaceae.

In this study, we present *de novo* assembled genome and transcriptome data for three isolates of *E. voratum*. Incorporating publicly available genome-scale data from 16 Symbiodiniaceae taxa plus four free-living taxa external to the Symbiodiniaceae in a comparative genomic analysis, we examine genomic features in *E. voratum*. These include mobile elements, gene structures, gene-families, and pseudogenisation to gain insights into ancestral features of Symbiodiniaceae, and more broadly, Suessiales genome evolution.



# Results

## Genome-size reduction pre-dated divergence of Order Suessiales and Family

### Symbiodiniaceae

Using a mix of short- and long-read sequencing data (Table S1), we generated *de novo* genome assemblies for three isolates of *E. voratum* (assembly sizes 1.1-1.3 Gbp), with estimated haploid genome sizes of 1.2-1.9 Gbp (Table S2 and Fig. S1), completeness (BUSCO recovery 67.2-77.2%), and number of predicted genes (32,102-39,878) (Table 1, Tables S3 and S4) comparable to the other Symbiodiniaceae genomes (19, 21, 22, 33-36). We obtained all available genomic data from 23 dinoflagellate taxa: 19 from Symbiodiniaceae (Order Suessiales), two sister taxa of *P. glacialis* (Order Suessiales), and two distantly related free-living dinoflagellate taxa, *Prorocentrum cordatum* (Order Prorocentrales) and *Amphidinium gibbosum* (Order Amphidinales). The 21 Suessiales taxa were grouped into: (a) the earlier-branching, largely symbiotic genus *Symbiodinium* (S1), (b) the three exclusively free-living *E. voratum* isolates (Ev), (c) the later-branching symbiotic Symbiodiniaceae lineages (S2), and (d) the free-living outgroup *P. glacialis* (Po) sister to Family Symbiodiniaceae (Table S3). The phylogenetic positions of these groups relative to other dinoflagellates are shown in Fig. 1A, along with light micrographs of representative species in S1, S2, and Ev (Fig. 1B). Cell size of *E. voratum* (12.2-13.3  $\mu\text{m}$  (29)) is generally larger than S1 (e.g., *Symbiodinium microadriaticum* CassKB8; 8.0-11.0  $\mu\text{m}$  (23, 37)) or S2 cells (e.g., *D. trenchii* CCMP2556; 7.5-10.0  $\mu\text{m}$  (23)).

The most striking feature of genome evolution among Suessiales is the marked reduction in genome size that occurred in the common ancestor of this lineage. Whereas free-living dinoflagellates external to the Suessiales have genomes that range widely in size from ca. 5-200 Gbp, except the parasitic *Amoebophrya ceratii* that has a highly reduced genome of size 0.1 Gbp, all Suessiales genomes have a much narrower size range from 0.7-2.0 Gbp, estimated using sequencing data (Fig. 1A). This is accompanied by a ~40% loss in gene families prior to the diversification of Suessiales, when compared to their closest dinoflagellate relatives (node N1 in Fig. 1A). This pattern is reminiscent of the red algae (Rhodophyta), whose common ancestor underwent massive genome reduction, precipitating the loss of canonical eukaryotic features such as flagella-based motility, phytochromes, and autophagy (38). These algae split into two monophyletic lineages, the extremophilic

Cyanidiophytina that specialised to life in hot spring environments, and the species-rich mesophilic lineages (e.g., red seaweeds) that inhabit a variety of aquatic environments (38). Most red algae have therefore smaller genomes when compared to the green lineage and have adapted to diverse habitats through gene family evolution and horizontal gene transfer. In an analogous fashion in dinoflagellates, it appears that the Suessiales common ancestor underwent significant genome reduction, likely due to life in extreme habitats (e.g., the psychrophilic *Polarella glacialis*). This streamlining of the gene inventory may have played an important role in driving symbiotic associations with cnidarians that offered nutrient-rich and protected habitats within the animal tissues. The facultative lifestyle was likely retained in most Symbiodiniaceae because it offers the benefit of sexual reproduction during the free-living stage. The most substantial recovery from genome streamlining is offered by whole genome duplication, which has occurred in the *Durusdinium* lineage (33).

#### **Genome features of *E. voratum* versus early- and later-diverging symbiotic lineages**

Genome sequences of the three *E. voratum* isolates share high similarity with 96% sequence identity over 93% of bases (Fig. 2A). Repetitive regions containing protein-coding genes were highly conserved relative those of other Suessiales (the Order containing Symbiodiniaceae and the earlier branching sister *P. glacialis*). We identified 98,344 core *k*-mers ( $k = 23$ ; all possible 23-base sequences) that are common in genomes of all Suessiales taxa following Lo et al. (39), and recovered 95% of core 23-mers in repetitive regions of *E. voratum* (Fig. S2; see Materials and Methods). Among the three *E. voratum* genome datasets, we recovered 5-32 putative mitochondrial genome sequences in each dataset that encode the marker genes of *cob*, *cox1* and/or *cox3* (Table S5), and 6-32 putative plastid genome sequences in each dataset that encode the 16S/23S rRNA or one of the 11 plastid-encoded genes (40), including a putative empty minicircle sequence (Table S6).

Given the history of genome reduction, we investigated the traits that may differentiate *Effrenium* from the symbiotic lineages of Symbiodiniaceae. We studied genome size, intron evolution, gene family evolution, pseudogenisation, RNA editing, and phylogenetic signals in Ev, S1 and S2, relative to the outgroup Po. The GC content of coding regions varied among the Symbiodiniaceae lineages (Fig. 2B) and were significantly lower in S2 (mean 54.2%;  $p < 0.05$ ) relative to Ev (61.0%) and S1 (57.7%); in intronic regions, the mean GC is 44.6% (S2), 50.1% (Ev) and 50.4% (S1), whereas that of whole-genome

sequences is 45.8% (S2), 50.7% (Ev), and 50.6% (S1). GC-rich genome sequences confer bendability to DNA helices (41) and may prevent cell freezing or desiccation (42). Variation of GC content in dinoflagellate genomes does not appear to correlate to lifestyle; among the free-living species external to Symbiodiniaceae, genomes of *P. glacialis* and *A. gibbosum* has a mean GC content of 46.4%, similar to S2, whereas the genome of *Pr. cordatum* has the highest GC content described thus far for any dinoflagellate, at 59.7% (27). Intracellular bacteria have a mutational bias towards low genomic GC content, e.g. ~20% (43), but intracellular eukaryotes display both low and high extreme GC content patterns, ranging as low as 24% in the malaria parasite *Plasmodium falciparum* (44) to 67% in the green algal symbiont *Chlorella variabilis* in the ciliate *Paramecium* (45). The lower GC content in S2 genomes than the S1 counterparts underscores the dynamic nature of genomic GC content evolution in intracellular eukaryotes.

Mobile elements, particularly transposable elements (TEs), can influence genomic architecture and base composition, and have been used to reconstruct the evolutionary history of many species (46-48). Although facultative Symbiodiniaceae symbionts (i.e., S1 and S2) are expected to contain a larger proportion of mobile elements in their genomes when compared to free-living (Ev) lineages (9), no significant difference among the groups was observed in the overall abundance (Table S7 and Fig. S3A) or conservation of TEs (Fig. S3B). Although more contiguous genome assemblies generally contain more conserved repeats (Kimura substitution values centred around 3 for *D. trenchii* CCMP2556, *C. proliferum* SCF055 [formerly described as *C. goreau* SCF055 (18)], the three *E. voratum* isolates, *S. natans* CCMP2548, and *S. tridacnidorum* CCMP2592) compared to the others (i.e., values centred around 20), we note diverged repeats (Kimura values centred around 25) in the chromosome-scale assembly of *S. microadriaticum* CCMP2467 (Fig. S3B). This result suggests a potential technical bias in the recovery of mobile elements. Despite this issue, based on the proportions for distinct types of mobile elements in each group, we found significantly ( $p < 0.05$ ) more long interspersed nuclear elements (LINEs) in S1 (3.9%) compared to Ev (1.8%) and to S2 (1.9%), with the proportion of the outgroup Po at 8% (Fig. 2C). This result suggests that S1 likely retains ancestral LINEs, lending support to the notion of loss of LINEs after the diversification of basal Symbiodiniaceae genera (21).

Introner elements (IEs) are a type of mobile element consisting of inverted and direct repeat motifs found at 5'- and 3'-end of introns in diverse eukaryotes (49-52). Recent research

on dinoflagellates revealed that IEs are more abundant in free-living (within 10-12% of genes) than in symbiotic/parasitic species (0.8-6.0% of genes) (27, 53). Although not as high as in other free-living dinoflagellates, the Ev genomes exhibit more IE-containing genes (5%) than do the S1 (4%) and S2 genomes (3%) (Fig. 2D). IEs have been postulated to be non-autonomous and their mobility is dependent on transposases encoded in dinoflagellate genomes (53). We recovered transposase protein sequences from most of the Symbiodiniaceae genomes in this study (Table S8), suggesting a capacity for IEs to be mobile.

Significantly ( $p < 0.05$ ) longer genes were observed in Ev (mean 20 Kb) than S1 (8 Kb) and S2 (11 Kb) (Fig. 2E), primarily driven by longer intron sizes (introns make up, on average, 92% of a gene [Fig. 2F]; sizes peak at 1 Kb [Fig. 2G]) and higher intron density per gene (mean of 18 for Ev, 14 for S1, 14 for S2) (Fig. 2H). The driving mechanism for this trend may reflect one of two evolutionary scenarios: (a) intron expansion in Ev, or (b) intron contraction in S1/S2. In examples of the first scenario, TE-mediated insertions drive intron expansion and are biased toward the 5' end of genes to prevent disruption of functional elements (54), yielding larger intron sizes at 5' ends. We did not observe this trend in Ev (Fig. 2I). In the second scenario, which has been observed in endosymbiotic/parasitic organisms, the reduction of intron size and density occurs as a result of genome reduction and/or streamlining induced by spatial confinement in the host organism or cell (46, 55). Considering the evolutionary history of Symbiodiniaceae, intron contraction in S1/S2 taxa due to their symbiotic lifestyle is more plausible than intron expansion in Ev. Large introns observed in Po (mean 1.4 Kb) (Fig. 2G), albeit at a lower intron density per gene (Fig. 2H), lend further support to this notion.

## **Symbiogenesis shaped evolution of gene families and post-transcriptional processing in Symbiodiniaceae**

To examine the effect of symbiotic lifestyle on protein family evolution in Symbiodiniaceae, we first inferred 53,173 homologous protein families from all 811,611 protein sequences predicted from the 21 Suessiales genomes (see Materials and Methods). Most protein families (47,353 of 53,173 [89%]) were shared among the four groups (S1+S2+Ev+Po). With respect to functions annotated in all families, these families were enriched in functions such as cellular motility, biosynthetic processes for rRNA, antibiotics, and glycosides (Table S9).

There were more lineage-specific protein families in S1 (6,389) and S2 (4,056) than in Ev (1,734), and the two symbiotic groups (S1+S2) shared 3,357 protein families not found in the other groups (Fig. 3). The high number of protein families present only in symbiotic lineages that split from each other over 40 million years of evolution suggests convergent evolution due to the symbiotic lifestyle. These protein families were enriched for diverse functions including signalling, apoptosis, protein splicing, photosynthesis, cell adhesion, and various transferase activities (Fig. 3). Incidentally, Po shared more protein families with symbiotic lineages (1,290; S1+S2+Po) than with Ev (221; Ev+Po); these families were enriched in functions such as autophagy and microtubule organisation.

Facultative symbionts in Symbiodiniaceae are expected to display higher levels of pseudogenisation, a major feature of the resident genome syndrome (9). To investigate this issue, we identified putative pseudogenes in the Symbiodiniaceae genomes (Table S10) following González-Pech et al. (21). We defined the level of pseudogenisation,  $\Psi$ , as a ratio of the number of putative pseudogenes to the number of putative functional genes per homologous family; see Materials and Methods. We compared  $\Psi$  independently for Ev ( $\Psi_{Ev}$ ) against that for S1 ( $\Psi_{S1}$ ), S2 ( $\Psi_{S2}$ ), and the combined S1 and S2 ( $\Psi_{S1+S2}$ ), then identified protein families that exhibited significant difference ( $p < 0.05$ ) of this value. More protein families display  $\Psi_{S1} > \Psi_{Ev}$  (336) and  $\Psi_{S2} > \Psi_{Ev}$  (273; Fig. 4A), compared to  $\Psi_{S1} < \Psi_{Ev}$  (300) and  $\Psi_{S2} < \Psi_{Ev}$  (126; Fig. 4B). There was nine-fold more protein families exhibiting  $\Psi_{S1+S2} > \Psi_{Ev}$  (229; Fig. 4A) than vice versa (25; Fig. 4B). These pseudogenes are associated with a wide range of functions, including cell cycle processes and stimuli response (Figures 4C and 4D). The protein families that display significantly higher  $\Psi$  in the symbiotic lineages are mostly mutually exclusive from the 3,357 families that putatively experienced convergent evolution (only 16–23 families are represented in  $\Psi_{S1}$ ,  $\Psi_{S2}$ ,  $\Psi_{S1+S2}$ ). We found negligible technical biases in the clustering of homologous sequences that may affect our inference of pseudogenes, i.e., protein families displaying  $\Psi$  remained stable at different clustering parameters (Fig. S4; see Materials and Methods). These results suggest that in addition to convergent evolution in the symbiotic lineages, these lineages of Symbiodiniaceae have experienced a greater extent of pseudogenisation than has the free-living Ev.

Editing of mRNAs allows Symbiodiniaceae to increase the variability in protein isoforms (56). To assess mRNA editing in *E. voratum*, we focused on RCC1521, which has

the most contiguous genome assembly, and compared the rates and types of mRNA editing against a representative from S1 (*S. microadriaticum* CCMP2467 (56)) and S2 (*D. trenchii* CCMP2556 (33)). We identified 45,009 unique mRNA edited sites in *E. voratum*, about 13-fold and 4-fold greater than in *S. microadriaticum* and *D. trenchii*, respectively (Table S11). A larger proportion of genes in *E. voratum* (9,158, 28.5%) contain mRNA edits, compared to *S. microadriaticum* (774, 1.6%) and *D. trenchii* (4,227, 7.6%), although the distribution of substitution types is similar among the three species (Fig. S5A-D). Most edits in *D. trenchii* and *E. voratum* (> 60%) are located in exons (Fig. S5E), whereas in *S. microadriaticum* edits are evenly split between exons and introns, although this may be due to the more-fragmented genome assembly of Liew et al. (56). As also observed in *S. microadriaticum* (56), there is a slight bias for edits to occur near 5' ends of genes (within the first ~10% of gene length,  $p < 0.05$ ; Fig. S5F) and the edits tend to be located within 1 Kb of each other (versus the distribution expected at random,  $p < 0.05$ ; Fig. S5G). The high level of mRNA editing in Ev is consistent with data from another free-living dinoflagellate, *Pr. cordatum* (42,969 edited sites; 32,067 within 10,169 [12%] genes) (27). Together with our observation of fewer Ev-specific protein families than those specific to S1 or S2 (Fig. 2), these results suggest a more pronounced role of mRNA editing in generating functional diversity in free-living versus symbiotic dinoflagellate taxa. The relationship and impact of this RNA editing on the encoded proteins remain to be investigated using proteomics.

## Impact of symbiogenesis on phylogenetic signal of non-coding regions

Our alignment-based phylogenetic trees inferred using multiple protein families (Fig. 1A), the standard molecular marker of 18S rDNA (Fig. 5A), and the ITS2 (Fig. S6A) were consistent with previously established phylogenies (1, 57, 58). We then analysed the phylogenetic signal of whole-genome sequence data using a *k*-mer-based alignment-free (AF) approach (see Materials and Methods), focusing on distinct genome-sequence regions following Lo et al. (39). Interestingly, the inferred AF phylogenies of introns (Fig. 5B), repetitive regions (Fig. S6B), repeat-masked whole-genome sequences (Fig. 5C), and entire whole-genome sequences (Fig. S6C) placed Ev as the basal group, branching earlier than S1/S2. In comparison, the AF phylogenies for coding regions (i.e., coding sequences [CDS; Fig. 5D] and protein sequences [Fig. S6D]) were largely congruent with the 18S rDNA phylogeny (Fig. 5A), placing S1 as earlier branching than Ev. The branching orders of Ev vs S1/S2 in AF trees were supported by a robust jackknife support of  $\geq 96\%$  based on 100



subsampled replicates (Fig. 5B-D; see Materials and Methods). This trend is consistent with visualisation of the AF distances as a phylogenomic network (Fig. S6E), in which *E. voratum* is more closely related to *P. glacialis* based on intron sequences, and to *Symbiodinium* spp. based on CDS.

The incongruence between phylogenies of coding and non-coding regions with robust support of the distinct clades clearly indicate differential selective pressure acting on these two regions in Symbiodiniaceae genomes, as demonstrated in an earlier study (39). This is likely explained by incomplete lineage sorting, horizontal gene transfer, hybridisation, or convergent GC-biased gene conversion (59-61). This result may also reflect the retention of ancestral non-coding regions in the *E. voratum* genomes, and/or the loss of some non-coding regions in symbiotic lineages due to genome streamlining.

# **Symbiogenesis differentially affected early- versus late-branching symbiotic lineages of Symbiodiniaceae**

Following a possible genome reduction in the free-living ancestor of the Suessiales, some lineages may have developed symbiogenesis with a range of hosts, giving rise to the Symbiodiniaceae Family. Common and distinct genomic features we observed between early and late-branching symbiotic lineages of Symbiodiniaceae suggest an interplay between the geological eras during which they arose, and the corresponding coral morphology and ocean chemistry (Fig. 6). Ancestral Symbiodiniaceae inhabited stony corals presumably as early as 230 MYA in the late Triassic (2) and may have driven the Norian-Rhaetian reef bloom (62). These early Scleractinian corals (e.g., *Retiophyllia*) tended to be uniserial, i.e., possessing one corallite per branch, and phaceloid with thick walls (63, 64), and thus were less efficient at harvesting light (65). The ability of the early-diverging extant *Symbiodinium* to thrive under high or variable light (*I*) may be a trait inherited from their ancestor living in these ancient corals. Because these early Symbiodiniaceae adapted to different hosts, they likely underwent genome streamlining (9), experienced high pseudogenisation and a reduction in mRNA editing and intron sizes (Fig. 6), as observed here and in other studies (21, 56). Although these trends were also observed in the later-branching symbionts, *Symbiodinium* uniquely retained ancestral LINE repeats (Fig. 2C) which were lost in later-branching Symbiodiniaceae including *E. voratum*.

*E. voratum* is estimated to have diverged ~147 MYA in the late Jurassic (1). We did not find evidence for genome streamlining in *E. voratum*, but instead found genomic hallmarks associated with earlier-branching free-living lineages external to Family Symbiodiniaceae, e.g., more IE-containing genes and larger intron size than in S1 and S2. Given that *Effrenium* is also the sole genus within the Family that is exclusively free-living, we postulate that this lineage has not been impacted by symbiogenesis, in contrast to S1 or S2. Since the lineage diverged from S1, global events such as the breakup of Pangea (11, 66) and the Cretaceous-Paleogene mass extinction have occurred, along with changes in coral reef biomass (Fig. 6). Without additional evidence from the fossil record or ancient DNA analysis (oldest evidence of Suessiales is *P. glacialis* from just 9,000 years ago (67)), we cannot explain why *Effrenium* retained a free-living lifestyle. *Effrenium* and most other Symbiodiniaceae lineages (including free-living species from *Symbiodinium*) are capable of forming endolithic relationships with bacteria, e.g., as calcified biofilms (68, 69), but why *Effrenium* cannot form endosymbiosis with a host is unknown.

At the estimated time when S2 lineages diversified (~109 MYA), shallow-water corals were described to be multiserial, flatter, and more efficient at harvesting light (65). This is coincident with a rise in ocean temperature (i.e., “greenhouse Earth”, when no continental glaciers existed) and the switch in ocean chemistry from an aragonite sea to a calcite sea, which would have made it difficult for corals to build their aragonite skeletons (14) (Fig. 6). In contrast, bivalve rudists that could build aragonite or calcite shells (70) radiated and flourished (13, 15). These taxa likely harboured photosymbionts (12), presumably ancestral Symbiodiniaceae, given that extant Symbiodiniaceae (e.g., *S. tridacnidorum*) can inhabit modern bivalves (71). Although genomes of S2 exhibit lower GC content than those of S1, our results clearly indicate that both S1 and S2 underwent genome streamlining, which led to convergent evolution of protein families associated with functions relevant to forming a symbiotic association, such as cell signalling, apoptosis, and photosynthesis (Fig. 3). We posit that symbiogenesis drove genome evolution in Symbiodiniaceae and elicited common features such as pseudogenisation, lowered mRNA editing and intron contraction, but some features (such as LINE retention and GC content) were affected differently in earlier vs. later-branching symbiotic lineages.



## Discussion

Our results provide strong evidence for a phase of genome reduction that occurred in the Suessiales ancestor. Therefore, the Symbiodiniaceae have smaller genome sizes than most free-living dinoflagellates, not because of the coral symbiosis, but due to more ancient selective constraints. These results are consistent with (but do not prove) the appealing idea that symbiosis offered an “escape” from reduced functional capacity due to genome reduction during the early stages of Symbiodiniaceae evolution. Regardless, the mixture of obligate free-living to facultative lifestyles among extant Symbiodiniaceae has resulted in divergent paths of genome evolution. Our results demonstrate the retention of ancestral Symbiodiniaceae genome features in *E. voratum* (in contrast to symbiotic lineages) despite multiple emergences of symbiogenesis over the past 200 million years. These observations support the notion that evolution favoured a free-living lifestyle for *E. voratum* (and by extension the genus *Effrenium*), likely due to local selective pressures. Therefore, *Effrenium* presents a useful free-living outgroup for studying the structural and functional genome features of symbiotic Symbiodiniaceae, and the implications of these features on ecology and evolution, including but not limited to host specificity and the “facultativeness” of symbiotic associations.

## Materials and Methods

### *E. voratum* cultures

Cell cultures of *E. voratum* RCC1521, rt-383, and CCMP421 were provided by the LaJeunesse Lab in Pennsylvania State University, U.S.A. They were incubated using Daigo’s IMK medium at 25°C under light-dark cycles of 14:10 hours. RCC1521 and rt-383 were maintained at the University of Queensland, CCMP421 at Florida International University.

### Microscopy

Cell cultures of *B. minutum* Mf1.05b.01, *D. trenchii* CCMP2556, *E. voratum* CCMP421, *S. microadriaticum* Cass KB8, and *Symbiodinium linucheae* SSA01 were grown in f/2 medium (72, 73) prepared using artificial seawater. The cells were fixed for 30 minutes in 4% v/v formaldehyde:f/2 medium (salinity 35 ppt). Cells were then pelleted by centrifugation (300 g,

5 min, room temperature [RT]) and washed twice using the f/2medium. All micrographs were captured at 100x (with a 0.63x adapter) on an Olympus BX 63 in brightfield mode.

## Extraction of genomic DNA

To extract genomic DNA (gDNA) for RCC1521 and rt-383, cells were pelleted by spinning the culture at 300 g (5 min, RT). Then the cell pellet was resuspended in 100-500  $\mu$ L (higher volumes for more cells) prewarmed (at 60°C) lysis buffer (100mM Tris-HCl, 20mM EDTA, 4% CTAB (w/v), 1.4 NaCl, 1% 360,000 g·mol<sup>-1</sup> PVP (w/v), 2%  $\beta$ -mercaptoethanol). This mixture was transferred to liquid nitrogen pre-chilled mortar pestle and ground to a fine powder and high molecular weight (HMW) gDNA was extracted as described in Rai (74). Briefly, Proteinase K (200  $\mu$ L of stock at 20 mg/mL) was added, multiple rounds of chloroform:isoamyl alcohol (24:1 v/v) extractions were performed, the CTAB-DNA pellet was washed using ethanol, RNase A (4  $\mu$ L of stock at 20 mg/mL) was added, and HMW gDNA was captured by incubating with 7.5 M ammonium acetate. The final HMW gDNA was resuspended in Tris-HCl (10 mM, pH 8) prewarmed at 50 °C, then was stored at -20°C until sequencing.

*E. voratum* CCMP421 cells were pelleted and snap frozen in liquid nitrogen and ground along with glass beads (diameter 425-600  $\mu$ m), and the 2×CTAB method described in Stephens et al. (19) was followed. Briefly, the ground powder was transferred into a lysis buffer (100 mM Tris-HCl pH 8, 20 mM EDTA pH 8, 1.4 M NaCl, 2% w/v CTAB), mixed with RNase A (final concentration 20  $\mu$ g/mL) and incubated at 37°C (30 min), and then with Proteinase K (final concentration 120  $\mu$ g/mL) at 65°C (2h). The standard extractions using phenol-chloroform-isoamyl alcohol (25:24:1 v/v; centrifuged at 14,000 g, 5 min, RT) and chloroform-isoamyl alcohol (24:1 v/v; centrifuged at 14,000 g, 5 min, RT) were then performed. The DNA was precipitated using chilled isopropanol (18,000 g, 5 min, 4°C), washed using chilled 70% ethanol, then stored in Tris-HCl (10 mM, pH 8) until sequencing.

## Extraction of total RNA

To extract total RNA from *E. voratum* RCC1521 for Iso-Seq sequencing, cell pellets were lysed via five freeze-thaw cycles with 425-600  $\mu$ m diameter glass beads added to cell pellet, dipped in liquid nitrogen, vortexed, and thawed at 37°C), and then the QIAGEN RNeasy kit

was used following the plant tissue protocol. To increase transcriptome diversity, we extracted more RNA using a different method. Total RNA was extracted for RNA-Seq (RCC1521 and rt-383) and Iso-Seq (from rt-383) following Acosta-Maspons et al. (75) with slight modifications. Cells were first pelleted by centrifugation (300 g, 5 min). The cell pellet was suspended in 100–500  $\mu$ L lysis buffer (100mM Tris-HCl, 25 mM EDTA, 2% CTAB w/v, 2M NaCl, 0.75 g/L spermidine trihydrochloride, 4%  $\beta$ -mercaptoethanol). This mixture was transferred to a mortar and pestle that were prechilled in liquid nitrogen, and ground to a fine powder. The powder was swirled with liquid nitrogen and transferred to a Falcon tube (15 mL) standing in dry ice, then the liquid nitrogen was allowed to evaporate. Lysis buffer (5 mL; prewarmed at 65°C) was added, mixed by vortexing, and the tube was kept on ice for subsequent steps. An equal volume of chloroform:isoamyl alcohol (24:1 v/v) was mixed in; the mixture was divided into aliquots (2mL) in Eppendorf tubes and centrifuged (10,000 g, 10 min, 4°C). The clear supernatants were transferred to new tubes (2mL each) before the extraction with chloroform:isoamyl alcohol (24:1 v/v) was repeated. Nucleic acids were precipitated using LiCl (final concentration 2M) overnight at 4°C, and centrifuged (17,000 g, 30 min, 4°C). The resulting pellet was resuspended in the SSTE buffer (50  $\mu$ L; 1 M NaCl, 0.5% SDS w/v, 10mM Tris-HCl pH 8, 1mM EDTA; prewarmed at 65°C); the samples were not set on ice to avoid undesirable precipitates. Further chloroform:isoamyl alcohol (24:1 v/v) extraction was performed (centrifuged 10,000 g, 10 min, 4°C), and the RNA pellet was precipitated using an equal volume of 2-propanol (incubated 10 min at RT, then centrifuged at 17,000 g, 10 min, 4°C). The pellet was washed with 80% ethanol (500  $\mu$ L), dislodged by pulse vortexing (2 s), and the tube centrifuged (17,000 g, 5 min, 4°C); this step was repeated. The final pellet was air-dried (10 min) in a fume hood, resuspended nuclease-free water (25  $\mu$ L), and stored at -80°C.

## **Generation of genome data**

For short-read sequencing, the libraries for RCC1521 and rt-383 were prepared using the Illumina TruSeq Nano kit with 350 bp targeted inserts following standard protocol, and then sequenced on the NovaSeq 6000 platform at Australian Genome Research Facility (Melbourne, Australia). For CCMP421, the genomic DNA library was prepared using the Chromium Genome Reagent Kit v2 Chemistry following the manufacturer's protocol (Step 2 GEM generation and barcoding onwards) and then sequenced on the NovaSeq 6000 platform at Florida International University.

For Nanopore long-read sequencing of RCC1521 and rt-383, the ligation kit SQK LSK-109 was used following standard protocol. Each library was sequenced on a MinION flow cell and rt-383 gDNA was further sequenced using a PromethION flow cell at the Genome Innovation Hub (GIH), the University of Queensland (Brisbane, Australia). The sequence reads were base-called using guppy v4.0.11 as part of the MinKNOW software v20.06.18, with the minimum read quality filter of 7.

For PacBio long-read sequencing of RCC1521 and rt-383, the gDNA of RCC1521 (unsheared, for continuous long-read [CLR] library) and rt-383 (sheared in 15-20 Kb fragments with Pippin Prep (Sage Science), for HiFi library) were used for library preparation using the SMRTbell Express Template Prep Kit 2.0 following the manufacturer's protocol. The RCC1521 and the rt-383 libraries were sequenced on the PacBio Sequel II platform, respectively at the University of Washington PacBio Sequencing Services (Seattle, WA, USA) and at the University of Queensland Sequencing Facility (Brisbane, Australia). The CLR reads for RCC1521 were acquired using the PacBio BAM2fastx toolkit, whereas the HiFi CCS reads for rt-383 were obtained using the CCS module of the SMRT Link pipeline v8.0.

## **Generation of transcriptome data**

Transcriptome data were generated for RCC1521 and rt-383. Illumina RNA-Seq libraries were generated using polyA-selection with the Dynabeads mRNA purification Kit and the Illumina Stranded mRNA Prep following standard protocols. Sequencing was performed on the Illumina NovaSeq 6000 platform at the Australian Genome Research Facility (Melbourne, Australia). PacBio Iso-Seq libraries were prepared using the NEBNext® Single Cell/Low Input cDNA Synthesis and Amplification Module (New England BioLabs) and the SMRTbell Express Template Prep Kit 2.0 following standard protocol and sequenced on the PacBio Sequel II at the University of Queensland Sequencing Facility.

## **Transcriptome assembly and processing**

For RNA-Seq data from RCC1521 and rt-383, adapters and unique molecular identifiers were removed using Illumina's bcl2fastq v2.20.0.422, and the reads were trimmed (for polyG and polyA) and filtered using fastp v0.20.0 (-A -L 35 -g -x --cut\_front --cut\_window\_size 4 --cut\_mean\_quality 15). The processed reads were assembled using Trinity v2.9.1 (76) in both

“de novo” (`--SS_lib_type RF --trimmomatic`) and “genome-guided” modes; for the latter, RNA-Seq reads were first mapped to the assembled genome using HISAT2 (77) before Trinity was run using `--SS_lib_type RF --genome_guided_bam --genome_guided_max_intron 70000`. We assessed the completeness of the each transcript set using BUSCO v5.1.2 (78) against the *alveolata\_odb10* database (Table S1).

Iso-Seq transcripts do not require assembly. The raw Iso-Seq sequences of RCC1521 and rt-383 underwent CCS generation and demultiplexing using the standalone modules CCS v4.2.0 and Lima v1.11.0. The rest of the IsoSeq processing steps (i.e., refining, clustering isoforms, and polishing) were conducted using the IsoSeq pipeline v3.3.0, resulting in a final set of high-quality transcripts.

## Estimation of genome size from sequencing data

Illumina short reads were used for estimating genome size based on *k*-mers. First, the reads from each genome dataset were processed to remove potential adapters (for 10X linked-reads of CCMP421, specifically the first 23 bases) and polyG tails using fastp v0.20.0 (79). Jellyfish v2.3.0 (80) was used to obtain *k*-mers of sizes 17-31. The *k*-mer distribution was then plotted for each *k*, and the genome size was estimated as the sum of observed *k*-mers divided by the mean coverage (corresponding to the peak of the curve), averaged from the different *k*-mer sizes (Table S2). The ploidy of the genome datasets was assessed using GenomeScope2 (81) based on 21-mer distribution and a better fit was observed using a haploid (*p*=1) model in all three cases. Genome size estimations of other dinoflagellates (Table S12) were taken from Rizzo et al. (82), Hou and Lin (28), Sano and Kato (83), and Kohli et al. (84).

## De novo genome assembly

*De novo* genome assemblies were generated for RCC1521 and rt-383 adopting a hybrid-data approach, combining Illumina (short reads), PacBio (long reads), and Nanopore (long reads) data using MaSuRCA (85, 86) v4.0.1 for RCC1521, and v3.4.2 for rt-383, with the built-in CABOG as the final assembler; the key distinction between these two versions of MaSuRCA is the six-fold decrease in run-time in v4.0.1 relative to that for v3.4.2, with negligible impact

on the yielded assemblies. For CCMP421, the *de novo* genome assembly was generated from 10X Genomics linked-read sequencing data using Supernova v2.1.1 (87).

RCC1521 and rt-383 assemblies were further scaffolded with L\_RNA\_scaffolder (88), using IsoSeq transcripts and *de novo* assembled transcripts from RNA-Seq (above). For CCMP421, linked-read distance information was first used to refine the assembly with ARBitR v0.2 (*-m 27k -s 10k*) (89) prior to scaffolding with L\_RNA\_scaffolder (88). Due to the low quality of the publicly available transcriptome data of CCMP421 (i.e., MMETSP1110 (90) with only 54% mapped to the corresponding assembled genome; Table S13), we used the *de novo* assembled transcripts from RCC1521 and rt-383 to scaffold the CCMP421 genome assembly via L\_RNA\_scaffolder.

To ensure high quality of each genome assembly, we identified and removed potential contaminant sequences of bacterial or archaeal sources following a decision tree based on analysis using BlobTools v1.1 (91) as described in earlier studies of algal genomes (22, 92); this step yielded the final assembly for each isolate. For each assembly, we assessed data completeness using BUSCO v5.1.2 (78) against the alveolata\_odb10 database. Genome-sequence similarity among the three *E. voratum* isolates was assessed using nucmer implemented in the MUMmer package v4.0.0beta2 (*--mum*) (93).

## Identification of mitochondrial and plastid genome sequences

We identified putative mitochondrial and plastid genome sequences from the three isolates of *E. voratum*. To search for mitochondrial scaffolds, we followed Stephens et al. (19) by adopting BLASTn v2.10.0+ (94) search against the assembled genomes, using the protein-coding sequences of *B. minutum* mitochondrial genes as queries (GenBank accessions LC002801.1 and LC002802.1;  $E \leq 10^{-10}$ ). We used BEDtools merge (95) to merge overlapping BLAST hits of the same gene (*-s -o collapse -c 1,2,3,4,5,6*), then used BEDtools intersect (*-wa -wb*) to check for overlaps with the predicted gene annotations. Genome scaffolds with BLAST hits that did not have any other predicted genes were considered putative mitochondrial genomes. We manually annotated the genes on the putative genome scaffolds using Artemis (96) with translation table 4.



To identify plastid genome fragments that are known to be shorter and may not be recovered in a hybrid genome assembly combining long- and short-read sequence data, we performed an independent short-read only genome assembly for each isolate using CLC Genomics Workbench v21.0.4 (Table S14). We used BLASTn search ( $E \leq 10^{-10}$ ) using protein-coding sequences of plastid-encoded genes for *Cladocodium* sp. C3 (GenBank accessions HG515015.1-HG515028.1) as query, and annotated the putative genome scaffolds in Artemis (translation table 11). To look for empty minicircles, we first determined the core region of all plastid genome scaffolds. We masked coding regions of the scaffolds using BEDtools *maskfasta* and did pairwise BLASTn searches. The region that was common to most scaffolds was considered the core region. We then used this as query in BLASTn searches among unannotated *E. voratum* short-read genome scaffolds. A scaffold was considered empty if they did not have any hits in the NCBI nr database (November 2020). Finally, we looked for evidence of circularisation in all of the recovered organellar genome scaffolds using nucmer (`--mum -l 0`) and mummerplot (`--layout -- png`) from MUMmer 4.0.0beta2 (93) to self-align the genome sequences and visualise the alignments.

### ***Ab initio* prediction of protein-coding genes**

To predict protein-coding genes, we used an integrated, multi-method workflow customised for dinoflagellates (22) incorporating transcriptome and protein evidence (pipeline available at [https://github.com/TimothyStephens/Dinoflagellate\\_Annotation\\_Workflow](https://github.com/TimothyStephens/Dinoflagellate_Annotation_Workflow)). We first predicted repetitive elements from the genome assembly, followed by gene predictions based on a) the genome only, b) protein sequence similarity, and c) mRNA transcripts.

*De novo* repeat families were predicted from the genome assembly using RepeatModeler v2.0.1 (97), and these repeats were added to the Dfam database (dfam.org; downloaded June 2019) to guide RepeatMasker v4.1.0 (98) in repeat-masking the genome assembly. Next, GeneMark-ES v4.65 (99) was used for *ab initio* gene prediction on the masked genome assembly. Protein-based gene prediction was performed using MAKER v2.31.10 (*protein2genome*) (100) modified to recognise dinoflagellate alternative splice sites. It integrated the custom repeat library from the repeat analysis step, and BLASTn/x (101) searches were performed against the combined protein sequence database of SwissProt (released March 2020) and the Suessiales sequences, hereby “Suessiales\_pep”, listed in Table S7 of Chen et al. (22).

For transcript-based gene prediction, Iso-Seq transcripts where available (i.e., for RCC1521 and rt-383) were mapped on the corresponding genome assembly using minimap2 v2.18 (102) for which the code was modified to recognise dinoflagellate alternative splice sites, using options `--secondary=no -ax splice:hq -uf --splice-flank=no`. The assembled transcripts from RNA-Seq (both *de novo* and genome-guided) for each isolate were mapped to the corresponding genome assembly using BLAT (103); for CCMP421, *de novo* assembled transcripts from RCC1521 and rt-383, plus the assembly of these reads guided by the CCMP421 genome, were used in this step (due to poor quality of the publicly available CCMP421 transcriptome data; see Tables S1 and S13). The resulting GFF3 files were input into PASA v2.4.1 (`--IMPORT_CUSTOM_ALIGNMENTS_GFF3 --transcribed_is_aligned_orient -C -R --MAX_INTRON_LENGTH 70000`) (104) which was modified to recognise dinoflagellate alternative splice sites.

The PASA-predicted genes were filtered in the following steps: they were searched against the combined RefSeq (release 98) and the Suessiales\_ppe database using BLASTp v2.2.26 (e-value <  $10^{-20}$ , both query and subject coverage > 80%) (101), putative transposon sequences were removed via running HHBLITS v3.3.0 (105) and TransposonPSI v1.0.0 (106) against the UniRef30\_3030\_03 database from Uniclust (uniclust.mmseqs.com) (107), redundant sequences were removed using CD-HIT v4.8.1 (`-c 0.75 -n 5`) (108), and the script *Prepare\_golden\_genes\_for\_predictors.pl* from the JAMg pipeline (<https://github.com/genomecuration/JAMg>) was used to produce a highly curated set of “golden genes”. These golden genes were used to guide the *ab initio* gene prediction tools SNAP (109) and AUGUSTUS v3.4.0 (110) on the repeat-masked genome assembly. Gene models from the five tools (MAKER, GeneMark-ES, PASA, SNAP, AUGUSTUS) were integrated using EVidenceModeler v1.1.1 (111). Finally, the resulting gene models were refined to correct exon boundaries, add UTRs, and incorporate gene models from alternative splicing using the *Load\_Current\_Gene\_Annotations.dbi* and *Launch\_PASA\_pipeline.pl* from the PASA pipeline (112, 113) iteratively for three rounds to yield the final gene models.

We assessed the completeness of the predicted protein sequences using BUSCO v5.1.2 (78) against the alveolata\_odb10 database in “protein” mode. Genes with transcript support were identified by aligning transcripts for each isolate to their predicted coding sequences using BLASTn (e-value <  $10^{-5}$ , percent identity  $\geq 90$  %, subject cover  $\geq 50$  %).



## Functional annotation of predicted genes

Functions of the predicted protein sequences were annotated based on BLASTp searches (e-value  $< 10^{-5}$  and query/subject cover  $\geq 50\%$ ) against the SwissProt (2022\_01) database. Then, those that had no hits were searched against TrEMBL (2022\_01) database; the function of the top protein hit was assumed to be the putative function of the query protein. The UniProt IDs were converted to Gene Ontology (GO) terms via the UniProtKB ID mapping tool (<https://www.uniprot.org/id-mapping>) in December 2022.

## Inferring phylogenetic tree based on multiple sequence alignment

To infer phylogenies for the 18S rDNA and ITS2 marker sequences, we first recovered 18S and ITS2 sequences from the three genome assemblies of *E. voratum* using BLASTn. Reference sequences for the 18S rDNA were downloaded from <https://doi.org/10.5061/dryad.1717129> (79 sequences) (1) and ITS2 from SymPortal (<https://symportal.org>; “published post-MED sequences” of 8,409 sequences downloaded 10 September 2021) (114), respectively. For each marker sequence set, multiple sequence alignment was generated using MAFFT v7.471 in *mafft-linsi* mode (115), trimmed using trimAl v1.4.rev15 (*-automated1*) (116), from which a maximum-likelihood phylogenetic tree was inferred using IQ-TREE v2.1.3 (*-nm 2000 -bb 2000 -m MFP*) (117). The 18S rDNA tree based on LaJeunesse et al. (1) and the associated divergence times was overlaid with major geological events and visualised using tvBOT (118).

To reconstruct a reference species tree of dinoflagellates based on strictly orthologous protein sequences, we incorporated 1,603,073 predicted protein sequences from 33 dinoflagellate taxa, comprising 21 Suessiales taxa (including the three *E. voratum* isolates in this study) and 12 other taxa external to Suessiales (Table S12) (90, 119, 120). These sequences were clustered into homologous sets using OrthoFinder v2.5.4 (121), from which a species tree was estimated from strictly orthologous sets.

## Alignment-free phylogenetic inference and core *k*-mers

We used an alignment-free approach to infer phylogenetic relationships from (a) whole-genome sequences (WGS) and from distinct genomic regions of (b) repeat-masked WGS, (c)

coding sequences (CDS), (d) introns, (e) annotated repeats, and (f) predicted protein sequences. Each of these distinct regions were extracted from assembled genome sequences using *gff3\_file\_to\_feature\_files.pl* implemented in PASA (104). We followed Lo et al. (39) to identify optimal  $k$ -mer length ( $k$ ) for each of these datasets. Briefly, for each dataset,  $k$ -mers at varied length  $k$  were enumerated using Jellyfish v2.3.0 (80); for all datasets, odd-numbered  $k$  between 13 and 27 were used, except for the repeats dataset (odd-numbered  $k$  values between 13 and 51 were used) and protein sequences (odd-numbered  $k$  values between 3 and 9 were used). For each dataset except the protein sequences, the optimal  $k$  was determined based on the cumulative proportion of unique  $k$ -mers and the cumulative proportion of distinct  $k$ -mers, at the point when distributions of both proportions reached a plateau (Fig. S7);  $k$  value determined this way was found to yield the greatest distinguishing power for phylogenetic analysis (122). For protein sequences, we inferred alignment-free phylogenies (see below) from each  $k$  and chose the  $k$  with a topology that best matched the 18S rDNA alignment-based tree as implemented in Lo et al. (39). The optimal  $k$  was identified as 23 for WGS and repeat-masked WGS, 19 for CDS, 21 for introns, 51 for annotated repeats, and 9 for protein sequences. Jellyfish v2.3.0 was used to extract  $k$ -mers at the corresponding optimal  $k$  length for each dataset, with the option *-C* used to enforce strand-specific directionality for the intron and CDS datasets.

To infer alignment-free (AF) phylogenies based on  $k$ -mers (i.e. using the optimal  $k$  for each corresponding dataset identified above), we derived pairwise distance based on  $D_2^S$  statistic (123) following Chan et al. (124), using *d2ssect* (<https://github.com/bakeronit/d2ssect>). These pairwise distances were then used to infer a phylogenetic tree using *neighbor* implemented in PHYLIP v3.698 (125). For each tree, we assessed node support based on jackknife analysis of 100 “pseudo-replicates” following Bernard et al. (126). In each pseudo-replicate, 40% of the data, in iteratively subsampled 100-bp regions at random, were deleted using the Python script *jackknife.py* from which an AF tree was inferred; the R script *Jackknife.r* was then used to calculate jackknife support value in percentage, among the pseudo-replicate trees, for each node in the original AF tree. These scripts are available at <https://github.com/chanlab-genomics/alignment-free-tools>.

To identify core  $k$ -mers (127) that are shared by all 21 Suessiales genomes used in this study, we used the optimal  $k = 23$  for the WGS dataset. Using the extracted 23-mers from the entire WGS dataset as input, core 23-mers were identified using the bash command *comm* (-12). BEDtools (95) *intersect* was used to find regions of overlap between the core  $k$ -mers and different genomic features.

## Analysis of gene family evolution

To examine the gene family evolution between *E. voratum* and the earlier-/later-branching symbiotic lineages of Symbiodiniaceae, we grouped 21 Suessiales protein sequence datasets into three groups: Ev, S1, and S2 (Table S3), with Po (*P. glacialis* CCMP1383 and CCMP2088) as the outgroup. The 811,661 protein sequences from the 21 Suessiales taxa were clustered into homologous families using OrthoFinder v2.5.4 (121). We then subset the shared/exclusive protein families among the different groups (Ev, S1, S2, and Po). GO enrichment was performed using the topGO package in R (algorithm = “elim”, statistic = “fisher”) for six comparisons: (a) shared genes in Ev+Po (test set) versus all genes in Ev+Po (background), (b) shared genes in S1+S2 versus all genes in S1 and S2, (c) shared genes in S1+S2+Po versus all genes in S1, S2, and Po, (d) shared genes in S1+S2+Ev+Po versus all genes in the 21 taxa, (e) exclusive genes to S1 versus all S1 genes, and (f) exclusive genes to Ev versus all Ev genes.

## Identification of pseudogenes

Pseudogenes were identified following the method described in González-Pech et al. (21) based on tBLASTn search using the predicted protein sequences as query against the corresponding genome sequences for which the predicted gene model sequences were masked. Matched regions ( $\geq 75\%$  identity) were considered fragments of pseudogenes, and fragments at no more than 1 Kb apart and in the same orientation were considered collectively as a pseudogene.

In this analysis, we focused on 752,954 protein sequences from the 19 Suessiales taxa, specifically excluding *S. natans* and *S. pilosum* from S1 to avoid signatures of free-living lifestyle in these taxa interfering with potential signatures of symbiogenesis. The protein sequences were first clustered into homologous families using OrthoFinder v2.5.4 (121). We define the extent of pseudogenisation,  $\Psi$ , as the ratio of the number of putative pseudogenes to the number of putative functional genes in a homologous family. We determined this value independently for Ev ( $\Psi_{Ev}$ ) against that for S1 ( $\Psi_{S1}$ ), S2 ( $\Psi_{S2}$ ), and the combined S1 and S2 ( $\Psi_{S1+S2}$ ); a protein family with  $\Psi_{S1} > \Psi_{Ev}$  indicates a greater extent of pseudogenisation in S1 than in Ev. We then ran a one-way ANOVA test and Tukey’s test using the R package *rstatix*

(<https://cran.r-project.org/package=rstatix>) to assess correlation among the  $\Psi$  values of Ev, S1, S2, and the combined S1+S2 groups.

To assess the robustness of our approach to the inflation parameter ( $I$ ) in single-linkage clustering within OrthoFinder that modulates granularity (i.e., sizes and numbers) of the resulting protein families, we ran OrthoFinder independently using  $I = 1.1, 1.3, 1.7$  and  $2.0$  in addition to the default value of  $1.5$ , and performed the analysis of pseudogenisation per above.

### Analysis of mRNA editing

For the analysis of mRNA editing, we focused on *E. voratum* RCC1521, and the representative genomes for S1 (*S. microadriaticum* CCMP2467) and S2 (*D. trenchii* CCMP2556), for which high-quality genome and transcriptome data are available. Editing of mRNAs was identified using JACUSA2 (128), based on observed nucleotide variants in the mapping of transcripts onto the genome, relative to the mapping of genome sequence reads onto the genome. First, gDNA reads were mapped on each genome using BWA-mem v0.7.17-r1198 (129) using default settings. Then, for each genome, RNA-Seq reads were mapped using HISAT2 v2.2.0 (*--rna-strandness RF*) (77) to the assembled genome sequences with a HGFM HISAT2 index (*hisat2-build --exon --ss*) informed by the annotated splice sites. To generate the index, the gene annotation file in GFF3 was converted to the GTF format using Gffread (130), and splice site and exon locations extracted with the *hisat2\_extract\_splice\_sites.py* and *hisat2\_extract\_exons.py* scripts. Iso-Seq reads, where available, were mapped using minimap2 v2.18 (102) for which the code was modified to recognise alternative splice sites of dinoflagellates, with options *--splice-flank=no --secondary=no -ax splice:hq -uf -junc-bed*.

Duplicate mappings were removed from the gDNA BAM files using Picard MarkDuplicates (*ASSUME\_SORTED=true REMOVE\_DUPLICATES=true CREATE\_INDEX=TRUE VALIDATION\_STRINGENCY=LENIENT*). The MD field documenting mismatched and deleted bases was added to the gDNA BAM files with samtools calmd (*-b*), as required as input for JACUSA2. JACUSA2 analysis was performed on the gDNA, RNA-Seq, and Iso-Seq BAM files using option *-a D,Y,H* to remove false positives caused by read starts/ends, indels, splice sites, and homopolymers. Due to the

different strand directionality, *-P2 RF-FIRSTSTRAND* was specified for the runs incorporating RNA-Seq data, and *-P2 FR-SECONDSTRAND* for the runs using Iso-Seq data. The results from JACUSA2 were overlayed using BEDtools intersect (95) at *-s -wo* with predicted genes (including isoforms), and the edited sites were visualised using JACUSA2helper (<https://github.com/dieterich-lab/JACUSA2helper>).

We followed Liew et al. (56) to assess 5' bias in the location of RNA editing and the propensity for edits to occur together. We calculated the frequency of the locations of each edit with respect to the features they were in (exon, intron, gene), normalised by the length of each feature. For each edit, its distance (in bp) to the closest upstream edit, and that to the closest downstream edit where all within the same gene, were determined. The average of these two values was used as the per-edit observed distance to neighbouring edits.

## Analysis of introner elements

To identify introner elements (IEs), we used Pattern Locator (131) to search for the patterns described in Farhat et al. (53): inverted repeats of 8-20 nucleotides within 30 bases of the 5' and 3' ends of each intron, flanked by direct repeats of 3-5 nucleotides. We first used Seqkit (132) to obtain the first and last 30 bases at each end of introns, then used Pattern Locator to identify the IEs.

## References

1. T. C. LaJeunesse, J. E. Parkinson, P. W. Gabrielson, H. J. Jeong, J. D. Reimer, C. R. Voolstra, S. R. Santos, Systematic revision of Symbiodiniaceae highlights the antiquity and diversity of coral endosymbionts. *Curr. Biol.* **28**, 2570-2580 (2018).
2. K. Frankowiak, E. Roniewicz, J. Stolarski, Photosymbiosis in Late Triassic scleractinian corals from the Italian Dolomites. *PeerJ* **9**, e11062 (2021).
3. R. Guerrero, L. Margulis, M. Berlanga, Symbiogenesis: the holobiont as a unit of evolution. *Int. Microbiol.* **16**, 133-143 (2013).
4. J. G. Stephen, H. J. Tripp, S. Givan, M. Podar, L. Vergin Kevin, D. Baptista, L. Bibbs, J. Eads, H. Richardson Toby, M. Noordewier, S. Rappé Michael, M. Short Jay, C. Carrington James, J. Mathur Eric, Genome streamlining in a cosmopolitan oceanic bacterium. *Science* **309**, 1242-1245 (2005).

5. J. C. Kwan, S. Donia Mohamed, W. Han Andrew, E. Hirose, G. Haygood Margo, W. Schmidt Eric, Genome streamlining and chemical defense in a coral reef symbiosis. *Proc. Natl. Acad. Sci. U. S. A.* **109**, 20655-20660 (2012).
6. H. G. Morrison, G. McArthur Andrew, D. Gillin Frances, B. Aley Stephen, D. Adam Rodney, J. Olsen Gary, A. Best Aaron, W. Z. Cande, F. Chen, J. Cipriano Michael, J. Davids Barbara, C. Dawson Scott, G. Elmendorf Heidi, B. Hehl Adrian, E. Holder Michael, M. Huse Susan, U. Kim Ulandt, E. Lasek-Nesselquist, G. Manning, A. Nigam, E. J. Nixon Julie, D. Palm, E. Passamaneck Nora, A. Prabhu, I. Reich Claudia, S. Reiner David, J. Samuelson, G. Svard Staffan, L. Sogin Mitchell, Genomic minimalism in the early diverging intestinal parasite *Giardia lamblia*. *Science* **317**, 1921-1926 (2007).
7. C. H. Opperman, M. Bird David, M. Williamson Valerie, S. Rokhsar Dan, M. Burke, J. Cohn, J. Cromer, S. Diener, J. Gajan, S. Graham, T. D. Houfek, Q. Liu, T. Mitros, J. Schaff, R. Schaffer, E. Scholl, R. Sosinski Bryon, P. Thomas Varghese, E. Windham, Sequence and genetic map of *Meloidogyne hapla*: a compact nematode genome for plant parasitism. *Proc. Natl. Acad. Sci. U. S. A.* **105**, 14802-14807 (2008).
8. J. P. McCutcheon, N. A. Moran, Extreme genome reduction in symbiotic bacteria. *Nat. Rev. Microbiol.* **10**, 13-26 (2012).
9. R. A. González-Pech, D. Bhattacharya, M. A. Ragan, C. X. Chan, Genome evolution of coral reef symbionts as intracellular residents. *Trends Ecol. Evol.* **34**, 799-806 (2019).
10. S. Vulpius, W. Kiessling, New constraints on the last aragonite–calcite sea transition from early Jurassic ooids. *Facies* **64**, 3 (2017).
11. A. Schettino, E. Turco, Breakup of Pangaea and plate kinematics of the central Atlantic and Atlas regions. *Geophys. J. Int.* **178**, 1078-1097 (2009).
12. N. J. de Winter, S. Goderis, S. J. M. Van Malderen, M. Sinnesael, S. Vansteenberge, C. Snoeck, J. Belza, F. Vanhaecke, P. Claeys, Subdaily-scale chemical variability in a *Torreites sanchezi* rudist shell: implications for rudist paleobiology and the Cretaceous day-night cycle. *Paleoceanogr. Paleoclimatol.* **35**, e2019PA003723 (2020).
13. G. D. Stanley, B. van de Schootbrugge, in *Coral Bleaching: Patterns, Processes, Causes and Consequences*, M. J. H. van Oppen, J. M. Lough, Eds. (Springer International Publishing, Cham, 2018), pp. 9-26.
14. J. M. Pandolfi, W. Kiessling, Gaining insights from past reefs to inform understanding of coral reef response to global climate change. *Curr. Opin. Environ. Sustain.* **7**, 52-58 (2014).



- 771 15. J. E. N. Veron, in *Encyclopedia of Modern Coral Reefs: Structure, Form and Process*,  
772 D. Hopley, Ed. (Springer Netherlands, Dordrecht, 2011), pp. 947-957.
- 773 16. D. J. Thornhill, A. M. Lewis, D. C. Wham, T. C. LaJeunesse, Host-specialist lineages  
774 dominate the adaptive radiation of reef coral endosymbionts. *Evolution* **68**, 352-367  
775 (2014).
- 776 17. K. E. Turnham, D. C. Wham, E. Sampayo, T. C. LaJeunesse, Mutualistic microalgae  
777 co-diversify with reef corals that acquire symbionts during egg development. *ISME J.*  
778 **15**, 3271-3285 (2021).
- 779 18. C. C. Butler, K. E. Turnham, A. M. Lewis, M. R. Nitschke, M. E. Warner, D. W.  
780 Kemp, O. Hoegh-Guldberg, W. K. Fitt, M. J. H. van Oppen, T. C. LaJeunesse, Formal  
781 recognition of host-generalist species of dinoflagellate (*Cladocopium*,  
782 Symbiodiniaceae) mutualistic with Indo-Pacific reef corals. *J. Phycol.*,  
783 doi:10.1111/jpy.13340 (2023).
- 784 19. T. G. Stephens, R. A. González-Pech, Y. Cheng, A. R. Mohamed, D. W. Burt, D.  
785 Bhattacharya, M. A. Ragan, C. X. Chan, Genomes of the dinoflagellate *Polarella*  
786 *glacialis* encode tandemly repeated single-exon genes with adaptive functions. *BMC*  
787 *Biol.* **18**, 56 (2020).
- 788 20. T. Li, L. Yu, B. Song, Y. Song, L. Li, X. Lin, S. Lin, Genome improvement and core  
789 gene set refinement of *Fugacium kawagutii*. *Microorganisms* **8**, 102 (2020).
- 790 21. R. A. González-Pech, T. G. Stephens, Y. Chen, A. R. Mohamed, Y. Cheng, S. Shah,  
791 K. E. Dougan, M. D. A. Fortuin, R. Lagorce, D. W. Burt, D. Bhattacharya, M. A.  
792 Ragan, C. X. Chan, Comparison of 15 dinoflagellate genomes reveals extensive  
793 sequence and structural divergence in family Symbiodiniaceae and genus  
794 *Symbiodinium*. *BMC Biol.* **19**, 73 (2021).
- 795 22. Y. Chen, S. Shah, K. E. Dougan, M. J. H. van Oppen, D. Bhattacharya, C. X. Chan,  
796 Improved *Cladocopium goreau* genome assembly reveals features of a facultative  
797 coral symbiont and the complex evolutionary history of dinoflagellate genes.  
798 *Microorganisms* **10**, 1662 (2022).
- 799 23. T. C. LaJeunesse, G. Lambert, R. A. Andersen, M. A. Coffroth, D. W. Galbraith,  
800 *Symbiodinium* (Pyrrophyta) genome sizes (DNA content) are smallest among  
801 dinoflagellates. *J. Phycol.* **41**, 880-886 (2005).
- 802 24. O. S. Saad, X. Lin, T. Y. Ng, L. Li, P. Ang, S. Lin, Genome Size, rDNA Copy, and  
803 qPCR Assays for Symbiodiniaceae. *Front. Microbiol.* **11**, 847 (2020).
- 804 25. P. J. Rizzo, The enigma of the dinoflagellate chromosome. *J. Protozool.* **38**, 246-252  
805 (1991).

26. P. J. Rizzo, Those amazing dinoflagellate chromosomes. *Cell Res.* **13**, 215-217 (2003).
27. K. E. Dougan, Z.-L. Deng, L. Wöhlbrand, C. Reuse, B. Bunk, Y. Chen, J. Hartlich, K. Hiller, U. John, J. Kalvelage, J. Mansky, M. Neumann-Schaal, J. Overmann, J. Petersen, S. Sanchez-Garcia, K. Schmidt-Hohagen, S. Shah, C. Spröer, H. Sztajer, H. Wang, D. Bhattacharya, R. Rabus, D. Jahn, C. X. Chan, I. Wagner-Döbler, Multi-omics analysis reveals the molecular response to heat stress in a “red tide” dinoflagellate. *bioRxiv*, 2022.2007.2025.501386 (2022).
28. Y. Hou, S. Lin, Distinct gene number-genome size relationships for eukaryotes and non-eukaryotes: gene content estimation for dinoflagellate genomes. *PLoS ONE* **4**, e6978 (2009).
29. H. J. Jeong, S. Y. Lee, N. Kang, Y. Yoo, A. S. Lim, M. J. Lee, W. Yih, H. Yamashita, T. LaJeunesse, Genetics and morphology characterize the dinoflagellate *Symbiodinium voratum*, n. sp., (Dinophyceae) as the sole representative of *Symbiodinium* Clade E. *J. Eukaryot. Microbiol.* **61**, 75-94 (2014).
30. T. Xiang, E. A. Hambleton, J. C. DeNofrio, J. R. Pringle, A. R. Grossman, Isolation of clonal axenic strains of the symbiotic dinoflagellate *Symbiodinium* and their growth and host specificity. *J. Phycol.* **49**, 447-458 (2013).
31. Y. Gabay, V. M. Weis, S. K. Davy, Symbiont identity influences patterns of symbiosis establishment, host growth, and asexual reproduction in a model cnidarian-dinoflagellate symbiosis. *Biol. Bull.* **234**, 1-10 (2018).
32. G. Hansen, N. Daugbjerg, *Symbiodinium natans* sp. nov.: a “free-living” dinoflagellate from tenerife (Northeast-Atlantic Ocean). *J. Phycol.* **45**, 251-263 (2009).
33. K. E. Dougan, A. J. Bellantuono, T. Kahlke, R. M. Abbriano, Y. Chen, S. Shah, C. Granados-Cifuentes, M. J. H. van Oppen, D. Bhattacharya, D. J. Suggett, C. X. Chan, M. Rodriguez-Lanetty, Whole-genome duplication in an algal symbiont serendipitously confers thermal tolerance to corals. *bioRxiv*, 2022.2004.2010.487810 (2022).
34. S. J. Robbins, C. M. Singleton, C. X. Chan, L. F. Messer, A. U. Geers, H. Ying, A. Baker, S. C. Bell, K. M. Morrow, M. A. Ragan, D. J. Miller, S. Forêt, E. Ball, R. Beeden, M. Berumen, M. Aranda, T. Ravasi, P. Bongaerts, O. Hoegh-Guldberg, I. Cooke, B. Leggat, S. Sprungala, A. Fitzgerald, C. Shang, P. Lundgren, T. Fyffe, F. Rubino, M. van Oppen, K. Weynberg, S. J. Robbins, C. M. Singleton, C. Xin Chan, L. F. Messer, A. U. Geers, H. Ying, A. Baker, S. C. Bell, K. M. Morrow, M. A. Ragan, D. J. Miller, S. Foret, C. R. Voolstra, G. W. Tyson, D. G. Bourne, C. R. Voolstra, G. W. Tyson, D. G. Bourne, C. ReFuGe, A genomic view of the reef-building coral *Porites lutea* and its microbial symbionts. *Nat. Microbiol.* **4**, 2090-2100 (2019).



- 845 35. E. Shoguchi, C. Shinzato, T. Kawashima, F. Gyoja, S. Mungpakdee, R. Koyanagi, T.  
846 Takeuchi, K. Hisata, M. Tanaka, M. Fujiwara, M. Hamada, A. Seidi, M. Fujie, T.  
847 Usami, H. Goto, S. Yamasaki, N. Arakaki, Y. Suzuki, S. Sugano, A. Toyoda, Y.  
848 Kuroki, A. Fujiyama, M. Medina, Mary A. Coffroth, D. Bhattacharya, N. Satoh, Draft  
849 assembly of the *Symbiodinium minutum* nuclear genome reveals dinoflagellate gene  
850 structure. *Curr. Biol.* **23**, 1399-1408 (2013).
- 851 36. A. Nand, Y. Zhan, O. R. Salazar, M. Aranda, C. R. Voolstra, J. Dekker, Genetic and  
852 spatial organization of the unusual chromosomes of the dinoflagellate *Symbiodinium*  
853 *microadriaticum*. *Nat. Genet.* **53**, 618-629 (2021).
- 854 37. E. Biquand, N. Okubo, Y. Aihara, V. Rolland, D. C. Hayward, M. Hatta, J.  
855 Minagawa, T. Maruyama, S. Takahashi, Acceptable symbiont cell size differs among  
856 cnidarian species and may limit symbiont diversity. *ISME J.* **11**, 1702-1712 (2017).
- 857 38. D. Bhattacharya, H. Qiu, J. Lee, H. Su Yoon, A. P. M. Weber, D. C. Price, When less  
858 is more: red algae as models for studying gene loss and genome evolution in  
859 eukaryotes. *Crit. Rev. Plant Sci.* **37**, 81-99 (2018).
- 860 39. R. Lo, K. E. Dougan, Y. Chen, S. Shah, D. Bhattacharya, C. X. Chan, Alignment-free  
861 analysis of whole-genome sequences from Symbiodiniaceae reveals different  
862 phylogenetic signals in distinct regions. *Front. Plant Sci.* **13**, 815714 (2022).
- 863 40. A. C. Barbrook, C. R. Voolstra, C. J. Howe, The chloroplast genome of a  
864 *Symbiodinium* sp. clade C3 isolate. *Protist* **165**, 1-13 (2014).
- 865 41. A. E. Vinogradov, DNA helix: the importance of being GC-rich. *Nucleic Acids Res.*  
866 **31**, 1838-1844 (2003).
- 867 42. P. Šmarda, P. Bureš, L. Horová, I. J. Leitch, L. Mucina, E. Pacini, L. Tichý, V.  
868 Grulich, O. Rotreklová, Ecological and evolutionary significance of genomic GC  
869 content diversity in monocots. *Proc. Natl. Acad. Sci. U. S. A.* **111**, E4096-E4102  
870 (2014).
- 871 43. R. Hershberg, D. A. Petrov, Evidence that mutation is universally biased towards AT  
872 in bacteria. *PLoS Genet.* **6**, e1001115 (2010).
- 873 44. H. Nikbakht, X. Xia, D. A. Hickey, The evolution of genomic GC content undergoes  
874 a rapid reversal within the genus *Plasmodium*. *Genome* **57**, 507-511 (2014).
- 875 45. G. Blanc, G. Duncan, I. Agarkova, M. Borodovsky, J. Gurnon, A. Kuo, E. Lindquist,  
876 S. Lucas, J. Pangilinan, J. Polle, A. Salamov, A. Terry, T. Yamada, D. D. Dunigan, I.  
877 V. Grigoriev, J.-M. Claverie, J. L. Van Etten, The *Chlorella variabilis* NC64A  
878 genome reveals adaptation to photosymbiosis, coevolution with viruses, and cryptic  
879 sex. *Plant Cell* **22**, 2943-2955 (2010).

- 880 46. L. Cai, B. J. Arnold, Z. Xi, D. E. Khost, N. Patel, C. B. Hartmann, S. Manickam, S.  
881 Sasirat, L. A. Nikolov, S. Mathews, T. B. Sackton, C. C. Davis, Deeply altered  
882 genome architecture in the endoparasitic flowering plant *Sapria himalayana* Griff.  
883 (Rafflesiaceae). *Curr. Biol.* **31**, 1002-1011.e1009 (2021).
- 884 47. M. Osanai-Futahashi, Y. Suetsugu, K. Mita, H. Fujiwara, Genome-wide screening and  
885 characterization of transposable elements and their distribution analysis in the  
886 silkworm, *Bombyx mori*. *Insect Biochem. Mol. Biol.* **38**, 1046-1057 (2008).
- 887 48. N. A. Rayan, R. C. H. del Rosario, S. Prabhakar, Massive contribution of transposable  
888 elements to mammalian regulatory sequences. *Semin. Cell Dev. Biol.* **57**, 51-56  
889 (2016).
- 890 49. J. T. Huff, D. Zilberman, S. W. Roy, Mechanism for DNA transposons to generate  
891 introns on genomic scales. *Nature* **538**, 533-536 (2016).
- 892 50. A. Z. Worden, J.-H. Lee, T. Mock, P. Rouzé, M. P. Simmons, A. L. Aerts, A. E.  
893 Allen, M. L. Cuvelier, E. Derelle, M. V. Everett, E. Foulon, J. Grimwood, H.  
894 Gundlach, B. Henrissat, C. Napoli, S. M. McDonald, M. S. Parker, S. Rombauts, A.  
895 Salamov, P. Von Dassow, J. H. Badger, P. Coutinho, E. Demir, I. Dubchak, C.  
896 Gentemann, W. Eikrem, J. E. Gready, U. John, W. Lanier, E. A. Lindquist, S. Lucas,  
897 K. F. X. Mayer, H. Moreau, F. Not, R. Otillar, O. Panaud, J. Pangilinan, I. Paulsen, B.  
898 Piegu, A. Poliakov, S. Robbens, J. Schmutz, E. Toulza, T. Wyss, A. Zelensky, K.  
899 Zhou, E. V. Armbrust, D. Bhattacharya, U. W. Goodenough, Y. Van de Peer, I. V.  
900 Grigoriev, Green evolution and dynamic adaptations revealed by genomes of the  
901 marine picoeukaryotes *Micromonas*. *Science* **324**, 268-272 (2009).
- 902 51. A. van der Burgt, E. Severing, P. J. de Wit, J. Collemare, Birth of new spliceosomal  
903 introns in fungi by multiplication of introner-like elements. *Curr. Biol.* **22**, 1260-1265  
904 (2012).
- 905 52. L. Gozashti, S. W. Roy, B. Thornlow, A. Kramer, M. Ares, R. Corbett-Detig,  
906 Transposable elements drive intron gain in diverse eukaryotes. *Proc. Natl. Acad. Sci.*  
907 *U. S. A.* **119**, e2209766119 (2022).
- 908 53. S. Farhat, P. Le, E. Kayal, B. Noel, E. Bigeard, E. Corre, F. Maumus, I. Florent, A.  
909 Alberti, J.-M. Aury, T. Barbeyron, R. Cai, C. Da Silva, B. Istace, K. Labadie, D.  
910 Marie, J. Mercier, T. Rukwavu, J. Szymczak, T. Tonon, C. Alves-de-Souza, P. Rouzé,  
911 Y. Van de Peer, P. Wincker, S. Rombauts, B. M. Porcel, L. Guillou, Rapid protein  
912 evolution, organellar reductions, and invasive intronic elements in the marine aerobic  
913 parasite dinoflagellate *Amoebophrya* spp. *BMC Biol.* **19**, 1 (2021).
- 914 54. M. J. McCoy, A. Z. Fire, Intron and gene size expansion during nervous system  
915 evolution. *BMC Genomics* **21**, 360 (2020).

- 916 55. B. Wang, X. Liang, M. L. Gleason, T. Hsiang, R. Zhang, G. Sun, A chromosome-  
917 scale assembly of the smallest Dothideomycete genome reveals a unique genome  
918 compaction mechanism in filamentous fungi. *BMC Genomics* **21**, 321 (2020).
- 919 56. Y. J. Liew, Y. Li, S. Baumgarten, C. R. Voolstra, M. Aranda, Condition-specific  
920 RNA editing in the coral symbiont *Symbiodinium microadriaticum*. *PLoS Genet.* **13**,  
921 e1006619 (2017).
- 922 57. T. Shi, G. Niu, H. Kvitt, X. Zheng, Q. Qin, D. Sun, Z. Ji, D. Tchernov, Untangling  
923 ITS2 genotypes of algal symbionts in zooxanthellate corals. *Mol. Ecol. Resour.* **21**,  
924 137-152 (2021).
- 925 58. T. G. Stephens, M. A. Ragan, D. Bhattacharya, C. X. Chan, Core genes in diverse  
926 dinoflagellate lineages include a wealth of conserved dark genes with unknown  
927 functions. *Sci. Rep.* **8**, 17175 (2018).
- 928 59. E. D. Jarvis, S. Mirarab, A. J. Aberer, B. Li, P. Houde, C. Li, S. Y. Ho, B. C.  
929 Faircloth, B. Nabholz, J. T. Howard, A. Suh, C. C. Weber, R. R. da Fonseca, J. Li, F.  
930 Zhang, H. Li, L. Zhou, N. Narula, L. Liu, G. Ganapathy, B. Boussau, M. S. Bayzid,  
931 V. Zavidovych, S. Subramanian, T. Gabaldon, S. Capella-Gutierrez, J. Huerta-Cepas,  
932 B. Rekepalli, K. Munch, M. Schierup, B. Lindow, W. C. Warren, D. Ray, R. E.  
933 Green, M. W. Bruford, X. Zhan, A. Dixon, S. Li, N. Li, Y. Huang, E. P. Derryberry,  
934 M. F. Bertelsen, F. H. Sheldon, R. T. Brumfield, C. V. Mello, P. V. Lovell, M.  
935 Wirthlin, M. P. Schneider, F. Prosdociimi, J. A. Samaniego, A. M. Vargas Velazquez,  
936 A. Alfaro-Nunez, P. F. Campos, B. Petersen, T. Sicheritz-Ponten, A. Pas, T. Bailey,  
937 P. Scofield, M. Bunce, D. M. Lambert, Q. Zhou, P. Perelman, A. C. Driskell, B.  
938 Shapiro, Z. Xiong, Y. Zeng, S. Liu, Z. Li, B. Liu, K. Wu, J. Xiao, X. Yinqi, Q. Zheng,  
939 Y. Zhang, H. Yang, J. Wang, L. Smeds, F. E. Rheindt, M. Braun, J. Fjeldsa, L.  
940 Orlando, F. K. Barker, K. A. Jonsson, W. Johnson, K. P. Koepfli, S. O'Brien, D.  
941 Haussler, O. A. Ryder, C. Rahbek, E. Willerslev, G. R. Graves, T. C. Glenn, J.  
942 McCormack, D. Burt, H. Ellegren, P. Alstrom, S. V. Edwards, A. Stamatakis, D. P.  
943 Mindell, J. Cracraft, E. L. Braun, T. Warnow, W. Jun, M. T. Gilbert, G. Zhang,  
944 Whole-genome analyses resolve early branches in the tree of life of modern birds.  
945 *Science* **346**, 1320-1331 (2014).
- 946 60. K. O. Chan, C. R. Hutter, P. L. Wood, L. L. Grismer, R. M. Brown, Larger, unfiltered  
947 datasets are more effective at resolving phylogenetic conflict: introns, exons, and  
948 UCEs resolve ambiguities in golden-backed frogs (Anura: Ranidae; genus *Hylarana*).  
949 *Mol. Phylogen. Evol.* **151**, 106899 (2020).
- 950 61. E. Pessia, A. Popa, S. Mousset, C. Rezvoy, L. Duret, G. A. B. Marais, Evidence for  
951 widespread GC-biased gene conversion in eukaryotes. *Genome Biol. Evol.* **4**, 675-682  
952 (2012).
- 953 62. W. Kiessling, E. Roniewicz, L. Villier, P. Leonide, U. Struck, An early Hettangian  
954 coral reef in southern France implications for the end-Triassic reef crisis. *Palaaios* **24**,  
955 657-671 (2009).

- 956 63. A. G. Coates, B. C. J. Jeremy, Clonal growth, algal symbiosis, and reef formation by  
957 corals. *Paleobiology* **13**, 363-378 (1987).
- 958 64. G. D. Stanley, The evolution of modern corals and their early history. *Earth-Sci. Rev.*  
959 **60**, 195-225 (2003).
- 960 65. S. Enríquez, E. R. Méndez, O. Hoegh-Guldberg, R. Iglesias-Prieto, Key functional  
961 role of the optical properties of coral skeletons in coral ecology and evolution. *Proc.*  
962 *R. Soc. B* **284**, 20161667 (2017).
- 963 66. C. Bulois, M. Pubellier, N. Chamot-Rooke, M. Delescluse, Successive rifting events  
964 in marginal basins: the example of the Coral Sea region (Papua New Guinea).  
965 *Tectonics* **37**, 3-29 (2018).
- 966 67. S. De Schepper, J. L. Ray, K. S. Skaar, H. Sadatzki, U. Z. Ijaz, R. Stein, A. Larsen,  
967 The potential of sedimentary ancient DNA for reconstructing past sea ice evolution.  
968 *ISME J.* **13**, 2566-2577 (2019).
- 969 68. M. R. Nitschke, C. Fidalgo, J. Simões, C. Brandão, A. Alves, J. Serôdio, J. C.  
970 Frommlet, Symbiolite formation: a powerful in vitro model to untangle the role of  
971 bacterial communities in the photosynthesis-induced formation of microbialites. *ISME*  
972 *J.* **14**, 1533-1546 (2020).
- 973 69. J. C. Frommlet, M. L. Sousa, A. Alves, S. I. Vieira, D. J. Suggett, J. Serôdio, Coral  
974 symbiotic algae calcify ex hospite in partnership with bacteria. *Proc. Natl. Acad. Sci.*  
975 *U. S. A.* **112**, 6158-6163 (2015).
- 976 70. T. Steuber, H. Löser, Species richness and abundance patterns of Tethyan Cretaceous  
977 rudist bivalves (Mollusca: Hippuritacea) in the central-eastern Mediterranean and  
978 Middle East, analysed from a palaeontological database. *Palaeogeogr.,*  
979 *Palaeoclimatol., Palaeoecol.* **162**, 75-104 (2000).
- 980 71. E. Shoguchi, G. Beedesse, I. Tada, K. Hisata, T. Kawashima, T. Takeuchi, N.  
981 Arakaki, M. Fujie, R. Koyanagi, M. C. Roy, M. Kawachi, M. Hidaka, N. Satoh, C.  
982 Shinzato, Two divergent *Symbiodinium* genomes reveal conservation of a gene cluster  
983 for sunscreen biosynthesis and recently lost genes. *BMC Genomics* **19**, 458 (2018).
- 984 72. R. R. L. Guillard, J. H. Ryther, Studies of marine planktonic diatoms: I. *Cyclotella*  
985 *nana* hustedt, and *Detonula confervacea* (Cleve) Gran. *Can. J. Microbiol.* **8**, 229-239  
986 (1962).
- 987 73. R. R. L. Guillard, in *Culture of Marine Invertebrate Animals: Proceedings — 1st*  
988 *Conference on Culture of Marine Invertebrate Animals* Greenport, W. L. Smith, M.  
989 H. Chanley, Eds. (Springer US, Boston, MA, 1975), pp. 29-60.
- 990 74. S. K. Rai, “Total High Molecular Weight DNA extraction from plant tissues for long  
991 read sequencing” (2022); <https://dx.doi.org/10.17504/protocols.io.b5qyq5xw>

992 75. A. Acosta-Maspons, I. González-Lemes, A. A. Covarrubias, Improved protocol for  
993 isolation of high-quality total RNA from different organs of *Phaseolus vulgaris* L.  
994 *BioTechniques* **66**, 96-98 (2019).

995 76. M. G. Grabherr, B. J. Haas, M. Yassour, J. Z. Levin, D. A. Thompson, I. Amit, X.  
996 Adiconis, L. Fan, R. Raychowdhury, Q. Zeng, Z. Chen, E. Mauceli, N. Hacohen, A.  
997 Gnirke, N. Rhind, F. di Palma, B. W. Birren, C. Nusbaum, K. Lindblad-Toh, N.  
998 Friedman, A. Regev, Full-length transcriptome assembly from RNA-Seq data without  
999 a reference genome. *Nat. Biotechnol.* **29**, 644 (2011).

1000 77. D. Kim, J. M. Paggi, C. Park, C. Bennett, S. L. Salzberg, Graph-based genome  
1001 alignment and genotyping with HISAT2 and HISAT-genotype. *Nat. Biotechnol.* **37**,  
1002 907-915 (2019).

1003 78. F. A. Simão, R. M. Waterhouse, P. Ioannidis, E. V. Kriventseva, E. M. Zdobnov,  
1004 BUSCO: assessing genome assembly and annotation completeness with single-copy  
1005 orthologs. *Bioinformatics* **31**, 3210-3212 (2015).

1006 79. S. Chen, Y. Zhou, Y. Chen, J. Gu, fastp: an ultra-fast all-in-one FASTQ preprocessor.  
1007 *Bioinformatics* **34**, i884-i890 (2018).

1008 80. G. Marçais, C. Kingsford, A fast, lock-free approach for efficient parallel counting of  
1009 occurrences of *k*-mers. *Bioinformatics* **27**, 764-770 (2011).

1010 81. T. R. Ranallo-Benavidez, K. S. Jaron, M. C. Schatz, GenomeScope 2.0 and  
1011 Smudgeplot for reference-free profiling of polyploid genomes. *Nat. Commun.* **11**,  
1012 1432 (2020).

1013 82. P. J. Rizzo, M. Jones, S. M. Ray, Isolation and properties of isolated nuclei from the  
1014 Florida red tide dinoflagellate *Gymnodinium breve* (Davis). *J. Protozool.* **29**, 217-222  
1015 (1982).

1016 83. J. Sano, K. H. Kato, Localization and copy number of the protein-coding genes actin,  
1017  $\alpha$ -Tubulin, and HSP90 in the nucleus of a primitive dinoflagellate, *Oxyrrhis marina*.  
1018 *Zool. Sci.* **26**, 745-753 (2009).

1019 84. G. S. Kohli, U. John, R. I. Figueroa, L. L. Rhodes, D. T. Harwood, M. Groth, C. J. S.  
1020 Bolch, S. A. Murray, Polyketide synthesis genes associated with toxin production in  
1021 two species of *Gambierdiscus* (Dinophyceae). *BMC Genomics* **16**, 410 (2015).

1022 85. A. V. Zimin, G. Marçais, D. Puiu, M. Roberts, S. L. Salzberg, J. A. Yorke, The  
1023 MaSuRCA genome assembler. *Bioinformatics* **29**, 2669-2677 (2013).

1024 86. W. Wang, A. Das, D. Kainer, M. Schalamun, A. Morales-Suarez, B. Schwessinger, R.  
1025 Lanfear, The draft nuclear genome assembly of *Eucalyptus pauciflora*: a pipeline for  
1026 comparing *de novo* assemblies. *GigaScience* **9**, giz160 (2020).



1027 87. N. I. Weisenfeld, V. Kumar, P. Shah, D. M. Church, D. B. Jaffe, Direct determination  
1028 of diploid genome sequences. *Genome Res.* **27**, 757-767 (2017).

1029 88. W. Xue, J.-T. Li, Y.-P. Zhu, G.-Y. Hou, X.-F. Kong, Y.-Y. Kuang, X.-W. Sun,  
1030 L\_RNA\_scaffolder: scaffolding genomes with transcripts. *BMC Genomics* **14**, 604  
1031 (2013).

1032 89. M. Hiltunen, M. Ryberg, H. Johannesson, ARBitR: an overlap-aware genome  
1033 assembly scaffolder for linked reads. *Bioinformatics* **37**, 2203-2205 (2020).

1034 90. L. K. Johnson, H. Alexander, C. T. Brown, Re-assembly, quality evaluation, and  
1035 annotation of 678 microbial eukaryotic reference transcriptomes. *GigaScience* **8**,  
1036 giy158 (2019).

1037 91. A. V. Zimin, D. Puiu, M.-C. Luo, T. Zhu, S. Koren, G. Marçais, J. A. Yorke, J.  
1038 Dvořák, S. L. Salzberg, Hybrid assembly of the large and highly repetitive genome of  
1039 *Aegilops tauschii*, a progenitor of bread wheat, with the MaSuRCA mega-reads  
1040 algorithm. *Genome Res.* **27**, 787-792 (2017).

1041 92. C. Iha, K. E. Dougan, J. A. Varela, V. Avila, C. J. Jackson, K. A. Bogaert, Y. Chen,  
1042 L. M. Judd, R. Wick, K. E. Holt, M. M. Pasella, F. Ricci, S. I. Repetti, M. Medina, V.  
1043 R. Marcelino, C. X. Chan, H. Verbruggen, Genomic adaptations to an endolithic  
1044 lifestyle in the coral-associated alga *Ostreobium*. *Curr. Biol.* **31**, 1393-1402 (2021).

1045 93. G. Marçais, A. L. Delcher, A. M. Phillippy, R. Coston, S. L. Salzberg, A. Zimin,  
1046 MUMmer4: A fast and versatile genome alignment system. *PLoS Comput. Biol.* **14**,  
1047 e1005944 (2018).

1048 94. S. F. Altschul, W. Gish, W. Miller, E. W. Myers, D. J. Lipman, Basic local alignment  
1049 search tool. *J. Mol. Biol.* **215**, 403-410 (1990).

1050 95. A. R. Quinlan, I. M. Hall, BEDTools: a flexible suite of utilities for comparing  
1051 genomic features. *Bioinformatics* **26**, 841-842 (2010).

1052 96. T. Carver, S. R. Harris, M. Berriman, J. Parkhill, J. A. McQuillan, Artemis: an  
1053 integrated platform for visualization and analysis of high-throughput sequence-based  
1054 experimental data. *Bioinformatics* **28**, 464-469 (2011).

1055 97. J. M. Flynn, R. Hubley, C. Goubert, J. Rosen, A. G. Clark, C. Feschotte, A. F. Smit,  
1056 RepeatModeler2 for automated genomic discovery of transposable element families.  
1057 *Proc. Natl. Acad. Sci. U. S. A.* **117**, 9451 (2020).

1058 98. A. F. A. Smit, R. Hubley, P. Green, “RepeatMasker Open-4.0” (2017);  
1059 <https://www.repeatmasker.org>.

1060 99. A. Lomsadze, V. Ter-Hovhannisyan, Y. O. Chernoff, M. Borodovsky, Gene  
1061 identification in novel eukaryotic genomes by self-training algorithm. *Nucleic Acids*  
1062 *Res.* **33**, 6494-6506 (2005).

1063 100. B. L. Cantarel, I. Korf, S. M. C. Robb, G. Parra, E. Ross, B. Moore, C. Holt, A.  
1064 Sánchez Alvarado, M. Yandell, MAKER: an easy-to-use annotation pipeline designed  
1065 for emerging model organism genomes. *Genome Res.* **18**, 188-196 (2008).

1066 101. C. Camacho, G. Coulouris, V. Avagyan, N. Ma, J. Papadopoulos, K. Bealer, T. L.  
1067 Madden, BLAST+: architecture and applications. *BMC Bioinformatics* **10**, 421  
1068 (2009).

1069 102. H. Li, Minimap2: pairwise alignment for nucleotide sequences. *Bioinformatics* **34**,  
1070 3094-3100 (2018).

1071 103. W. J. Kent, BLAT--the BLAST-like alignment tool. *Genome Res.* **12**, 656-664 (2002).

1072 104. B. J. Haas, A. L. Delcher, S. M. Mount, J. R. Wortman, R. K. Smith, Jr., L. I.  
1073 Hannick, R. Maiti, C. M. Ronning, D. B. Rusch, C. D. Town, S. L. Salzberg, O.  
1074 White, Improving the *Arabidopsis* genome annotation using maximal transcript  
1075 alignment assemblies. *Nucleic Acids Res.* **31**, 5654-5666 (2003).

1076 105. M. Remmert, A. Biegert, A. Hauser, J. Söding, HHblits: lightning-fast iterative  
1077 protein sequence searching by HMM-HMM alignment. *Nat. Methods* **9**, 173-175  
1078 (2012).

1079 106. B. J. Haas, "TransposonPSI" (2010); <https://sourceforge.net/projects/transposonpsi/>.

1080 107. M. Mirdita, L. von den Driesch, C. Galiez, M. J. Martin, J. Söding, M. Steinegger,  
1081 Uniclust databases of clustered and deeply annotated protein sequences and  
1082 alignments. *Nucleic Acids Res.* **45**, D170-D176 (2017).

1083 108. W. Li, A. Godzik, CD-HIT: a fast program for clustering and comparing large sets of  
1084 protein or nucleotide sequences. *Bioinformatics* **22**, 1658-1659 (2006).

1085 109. I. Korf, Gene finding in novel genomes. *BMC Bioinformatics* **5**, 59 (2004).

1086 110. M. Stanke, O. Keller, I. Gunduz, A. Hayes, S. Waack, B. Morgenstern, AUGUSTUS:  
1087 ab initio prediction of alternative transcripts. *Nucleic Acids Res.* **34**, W435-W439  
1088 (2006).

1089 111. B. J. Haas, S. L. Salzberg, W. Zhu, M. Pertea, J. E. Allen, J. Orvis, O. White, C. R.  
1090 Buell, J. R. Wortman, Automated eukaryotic gene structure annotation using  
1091 EVIDENCEModeler and the Program to Assemble Spliced Alignments. *Genome Biol.* **9**,  
1092 R7 (2008).

1093 112. M. A. Campbell, B. J. Haas, J. P. Hamilton, S. M. Mount, C. R. Buell,  
1094 Comprehensive analysis of alternative splicing in rice and comparative analyses with  
1095 *Arabidopsis*. *BMC Genomics* **7**, 327 (2006).

1096 113. B. J. Haas, in *Nuclear pre-mRNA Processing in Plants*, A. S. N. Reddy, M. Golovkin,  
1097 Eds. (Springer Berlin Heidelberg, Berlin, Heidelberg, 2008), pp. 17-37.

1098 114. B. C. C. Hume, E. G. Smith, M. Ziegler, H. J. M. Warrington, J. A. Burt, T. C.  
1099 LaJeunesse, J. Wiedenmann, C. R. Voolstra, SymPortal: A novel analytical  
1100 framework and platform for coral algal symbiont next-generation sequencing ITS2  
1101 profiling. *Mol. Ecol. Resour.* **19**, 1063-1080 (2019).

1102 115. K. Katoh, D. M. Standley, MAFFT multiple sequence alignment software version 7:  
1103 improvements in performance and usability. *Mol. Biol. Evol.* **30**, 772-780 (2013).

1104 116. S. Capella-Gutiérrez, J. M. Silla-Martínez, T. Gabaldón, trimAl: a tool for automated  
1105 alignment trimming in large-scale phylogenetic analyses. *Bioinformatics* **25**, 1972-  
1106 1973 (2009).

1107 117. L.-T. Nguyen, H. A. Schmidt, A. von Haeseler, B. Q. Minh, IQ-TREE: a fast and  
1108 effective stochastic algorithm for estimating maximum-likelihood phylogenies. *Mol.*  
1109 *Biol. Evol.* **32**, 268-274 (2015).

1110 118. J. Xie, Y. Chen, G. Cai, R. Cai, Z. Hu, H. Wang, Tree Visualization By One Table  
1111 (tvBOT): a web application for visualizing, modifying and annotating phylogenetic  
1112 trees. *Nucleic Acids Res.*, doi:10.1093/nar/gkad1359 (2023).

1113 119. G. Beedessee, T. Kubota, A. Arimoto, K. Nishitsuji, R. F. Waller, K. Hisata, S.  
1114 Yamasaki, N. Satoh, J. i. Kobayashi, E. Shoguchi, Integrated omics unveil the  
1115 secondary metabolic landscape of a basal dinoflagellate. *BMC Biol.* **18**, 139 (2020).

1116 120. U. John, Y. Lu, S. Wohlrab, M. Groth, J. Janouškovec, G. S. Kohli, F. C. Mark, U.  
1117 Bickmeyer, S. Farhat, M. Felder, S. Frickenhaus, L. Guillou, P. J. Keeling, A.  
1118 Moustafa, B. M. Porcel, K. Valentin, G. Glöckner, An aerobic eukaryotic parasite  
1119 with functional mitochondria that likely lacks a mitochondrial genome. *Sci. Adv.* **5**,  
1120 eaav1110 (2019).

1121 121. D. M. Emms, S. Kelly, OrthoFinder: phylogenetic orthology inference for  
1122 comparative genomics. *Genome Biol.* **20**, 238 (2019).

1123 122. P. Greenfield, U. Roehm, Answering biological questions by querying *k*-mer  
1124 databases. *Concurr. Comput. Pract. Exper.* **25**, 497-509 (2013).

1125 123. G. Reinert, D. Chew, F. Sun, M. S. Waterman, Alignment-free sequence comparison  
1126 (I): statistics and power. *J. Comput. Biol.* **16**, 1615-1634 (2009).



- 1127 124. C. X. Chan, G. Bernard, O. Poirion, J. M. Hogan, M. A. Ragan, Inferring phylogenies  
1128 of evolving sequences without multiple sequence alignment. *Sci. Rep.* **4**, 6504 (2014).
- 1129 125. J. Felsenstein, “PHYLIP (Phylogeny Inference Package)” (2005);  
1130 <https://evolution.gs.washington.edu/phylip.html>.
- 1131 126. G. Bernard, C. X. Chan, M. A. Ragan, Alignment-free microbial phylogenomics  
1132 under scenarios of sequence divergence, genome rearrangement and lateral genetic  
1133 transfer. *Sci. Rep.* **6**, 28970 (2016).
- 1134 127. G. Bernard, P. Greenfield, M. A. Ragan, C. X. Chan, M. J. Claesson, *k*-mer similarity,  
1135 networks of microbial genomes, and taxonomic rank. *mSystems* **3**, e00257-00218  
1136 (2018).
- 1137 128. M. Piechotta, E. Wyler, U. Ohler, M. Landthaler, C. Dieterich, JACUSA: site-specific  
1138 identification of RNA editing events from replicate sequencing data. *BMC*  
1139 *Bioinformatics* **18**, 7 (2017).
- 1140 129. H. Li, R. Durbin, Fast and accurate short read alignment with Burrows-Wheeler  
1141 transform. *Bioinformatics* **25**, 1754-1760 (2009).
- 1142 130. G. Pertea, M. Pertea, GFF Utilities: GffRead and GffCompare [version 2; peer  
1143 review: 3 approved]. *F1000Res.* **9**, 304 (2020).
- 1144 131. J. Mrázek, S. Xie, Pattern locator: a new tool for finding local sequence patterns in  
1145 genomic DNA sequences. *Bioinformatics* **22**, 3099-3100 (2006).
- 1146 132. W. Shen, S. Le, Y. Li, F. Hu, SeqKit: A Cross-Platform and Ultrafast Toolkit for  
1147 FASTA/Q File Manipulation. *PLoS ONE* **11**, e0163962 (2016).
- 1148 133. M. Polne-Fuller, A novel technique for preparation of axenic cultures of  
1149 *Symbiodinium* (Pyrrophyta) through selective digestion by amoebae. *J. Phycol.* **27**,  
1150 552-554 (1991).
- 1151 134. F. H. Chang, Winter phytoplankton and microzooplankton populations off the coast of  
1152 Westland, New Zealand, 1979. *N. Z. J. Mar. Freshwat. Res.* **17**, 279-304 (1983).
- 1153 135. A. M. Quattrini, E. Rodríguez, B. C. Faircloth, P. F. Cowman, M. R. Brugler, G. A.  
1154 Farfan, M. E. Hellberg, M. V. Kitahara, C. L. Morrison, D. A. Paz-García, J. D.  
1155 Reimer, C. S. McFadden, Palaeoclimate ocean conditions shaped the evolution of  
1156 corals and their skeletons through deep time. *Nat. Ecol. Evol.* **4**, 1531-1538 (2020).
- 1157 136. E. L. Grossman, M. M. Joachimski, Ocean temperatures through the Phanerozoic  
1158 reassessed. *Sci. Rep.* **12**, 8938 (2022).

1159

# **Acknowledgements**

We are grateful to Todd LaJeunesse and Hannah Reich who generously supplied the cell cultures of two *Effrenium voratum* strains (RCC1521 and rt-383) used in this study. This project is supported by high-performance computing facilities at the National Computational Infrastructure (NCI) National Facility systems through the NCI Merit Allocation Scheme (Project d85) awarded to CXC, the University of Queensland Research Computing Centre, and computing facility at the Australian Centre for Ecogenomics, School of Chemistry and Molecular Biosciences at the University of Queensland.

# **Funding**

This research was supported by the University of Queensland Research Training Program scholarship (SS and YC), the Australian Research Council grant DP19012474 awarded to CXC and DB, the University of Queensland Genome Innovation Hub Collaborative Research grant awarded to CXC, and the NSF-IOS CAREER (1453519) grant awarded to MRL. DB was also supported by NSF grant NSF-OCE 1756616 and a NIFA-USDA Hatch grant (NJ01180).

# **Author contributions**

Conceptualization, SS, KED, DB and CXC; methodology, SS, KED, YC, SKR, AJB, VM and CXC; formal analysis, SS, KED, YC, RL, GL, MDAF, and VM; investigation, SS, KED; resources, SS, SKR, AJB, MRL, CXC, writing—original draft preparation, SS; writing—review and editing, SS, KED, DB, and CXC; visualisation, SS; supervision, KED, DB, CXC; funding acquisition, MRL, DB and CXC. All authors have read and agreed to the published version of the manuscript.

# **Competing interests**

The authors declare that they have no competing interests.

## Data and materials availability

All sequencing data generated from this study are available on NCBI GenBank *via* BioProject accession PRJEB61191. The assembled genome, predicted gene models and proteins, and the identified organellar genome sequences are available at <https://doi.org/10.48610/1f0377a>.

## Table

**Table 1. Genome assemblies and gene predictions of *E. voratum* RCC1521, rt-383, and CCMP421.**

| Isolate                           | RCC1521                                   | rt-383<br>(=CCMP3420)                                 | CCMP421                         |
|-----------------------------------|-------------------------------------------|-------------------------------------------------------|---------------------------------|
| Location of isolation             | Mediterranean<br>Sea off Blanes,<br>Spain | Eastern North<br>Pacific off<br>Santa Barbara,<br>USA | Cooks<br>Strait, New<br>Zealand |
| Reference                         | (29)                                      | (133)                                                 | (134)                           |
| Genome sequencing technologies    | Illumina,<br>PacBio,<br>Nanopore          | Illumina,<br>PacBio,<br>Nanopore                      | 10X<br>Linked-<br>reads         |
| Genome assembly size (Gb)         | 1.2                                       | 1.3                                                   | 1.1                             |
| Estimated genome size (Gb)        | 1.4                                       | 1.2                                                   | 1.9                             |
| GC-content of genome assembly (%) | 50.8                                      | 50.6                                                  | 50.9                            |
| Total read coverage               | 446×                                      | 212×                                                  | 153×                            |
| Number of genome scaffolds        | 3,881                                     | 11,607                                                | 38,022                          |
| N50 of genome assembly (Kb)       | 720                                       | 252                                                   | 304                             |
| Number of predicted genes         | 32,108                                    | 39,878                                                | 32,615                          |
| % BUSCO recovery (genome)         | 34.0                                      | 35.1                                                  | 20.4                            |
| % BUSCO recovery (proteins)       | 76.7                                      | 77.2                                                  | 67.2                            |

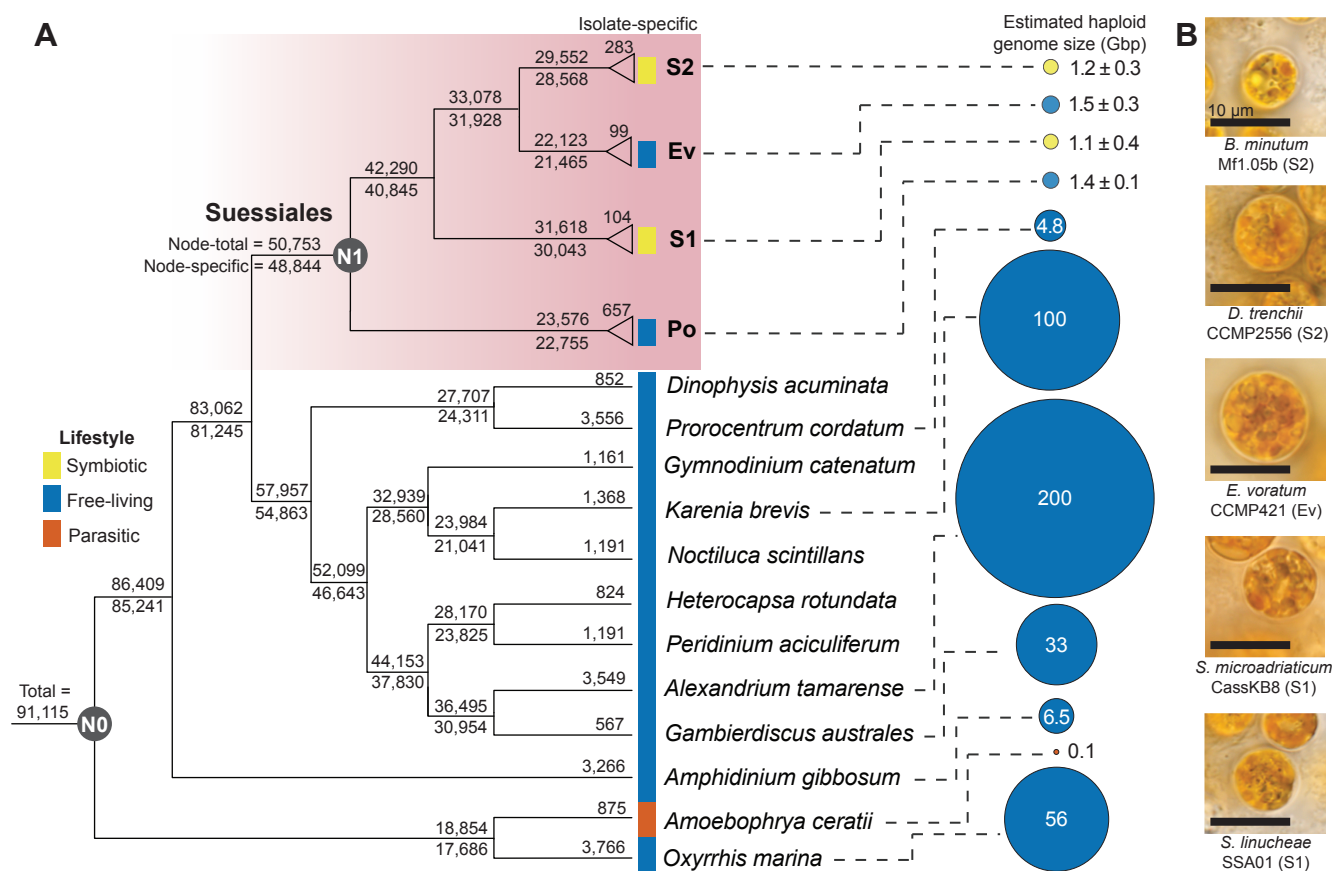

**Figure 1. Species tree of dinoflagellates alongside estimated genome sizes. (A)** The species tree was inferred using 91,115 orthologous protein sets derived from 1,420,328 protein sequences from 33 dinoflagellate taxa. Symbiotic lifestyles are shown in yellow, free-living in blue, and parasitic in orange. Node-total refers to the number of protein families which contain one or more taxa at the node. Node-specific are protein families that exclude taxa outside the node. Numbers at the tips of each branch represent isolate-specific protein families. For the S1, S2, Ev, and Po groups of Suessiales, the mean of isolate-specific protein families, and the mean ± standard deviation of estimated genome sizes are displayed. Node N0 contains homologous protein sets from all 33 taxa, whereas node N1 includes data from the 21 Suessiales. **(B)** Micrographs of representative taxa from the Symbiodiniaceae groups S1, S2, and Ev. Scale bar = 10 µm.

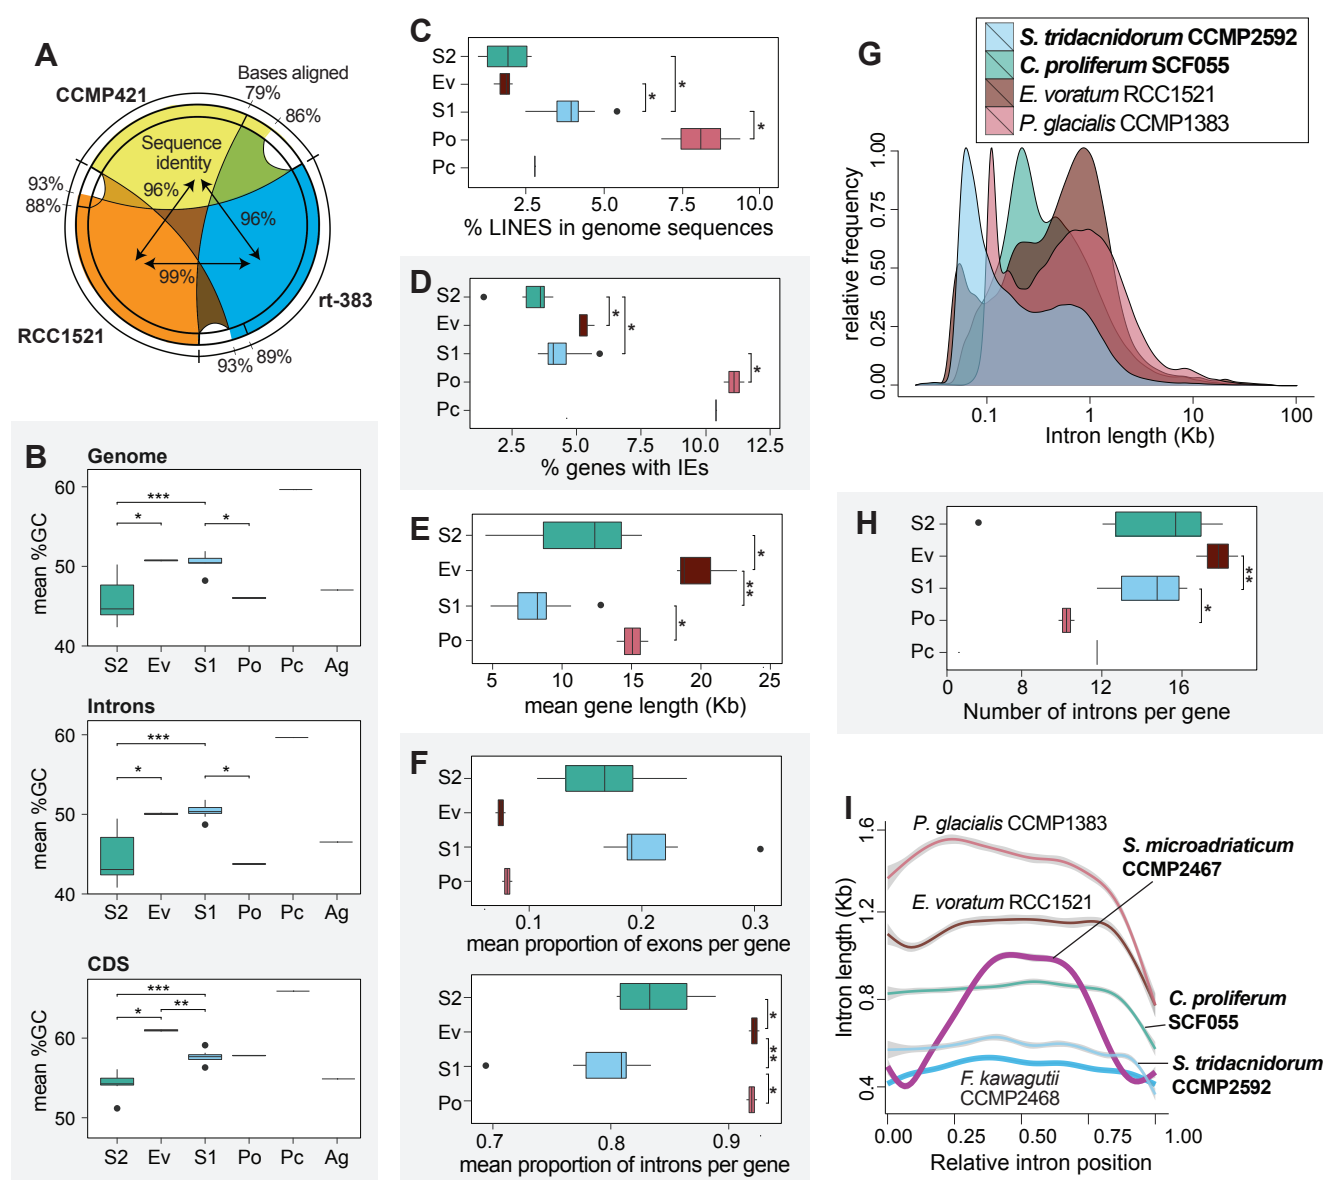

**Figure 2. Genome features of *E. voratum* and other dinoflagellates.** (A) Genome-sequence identity (italics within circle) and the percentage of aligned bases (outside circle) among the three *E. voratum* isolates. Features of representative genomes in the four Suessiales groups of S2, Ev, S1, and Po, plus *Prorocentrum cordatum* (Pc), in the order from the most-recent to most-ancient divergence, shown for (B) mean GC content in whole-genome, intronic, and CDS regions (*Amphidinium gibbosum* (Ag) was added for dinoflagellate-wide comparison), (C) percentage of mobile elements, and (D) percentage of genes containing intron elements (IEs). Gene features of Suessiales showing (E) mean gene length, (F) average proportions of exons and introns, (G) the relative frequency of introns by length (symbiotic lineages in boldface), (H) number of introns per gene, and (I) intron length versus relative intron position (symbiotic lineages in boldface). In all bar charts, \*, \*\*, \*\*\* represent  $p < 0.05$ ,  $< 0.01$ , and  $< 0.001$  respectively based on Wilcoxon rank sum test.

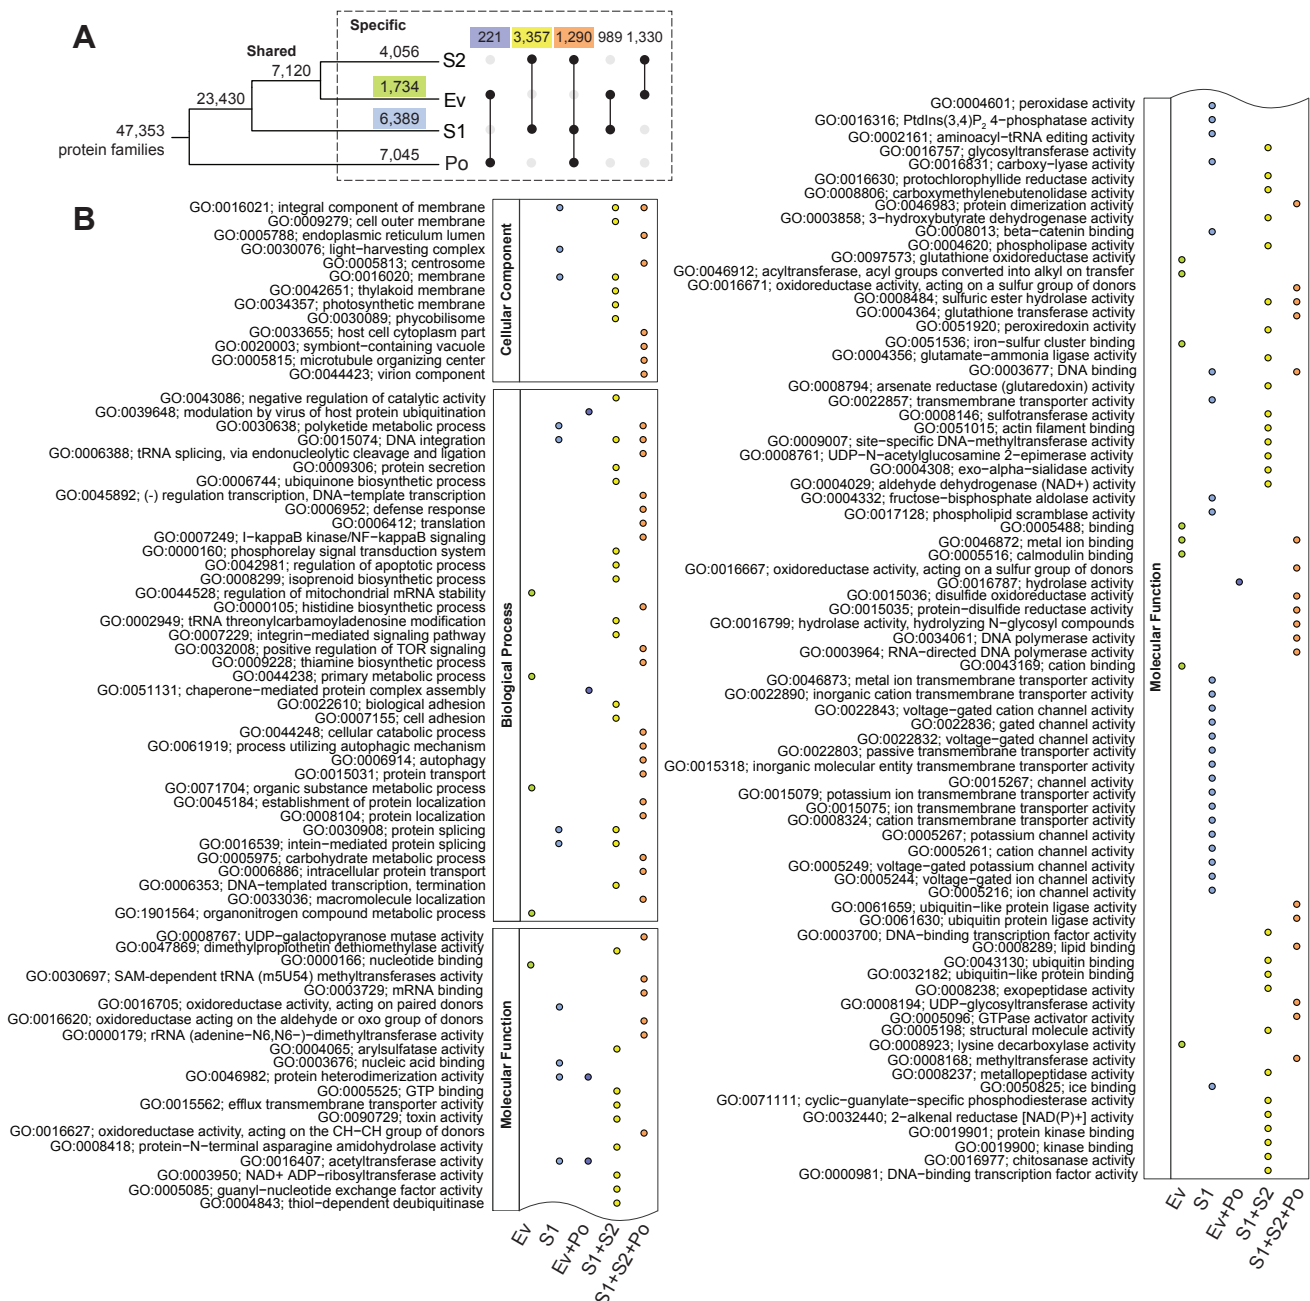

**Figure 3. Gene family evolution in Suessiales.** (A) Number of protein families is shown at each node and branch represents those that are shared among or specific to S1, Ev, S2, and/or Po. Number of families that are exclusive to Ev (green), to S1 (light blue), to Ev+Po (dark blue), to S2+S1 (yellow), and to S2+S1+Po (orange) were highlighted. (B) Enriched Gene Ontology (GO) terms for genes in the five distinct groups relative to all GO terms in the corresponding taxa, arranged in decreasing order of significance from top to bottom within the categories: Cellular Component, Biological Process, and Molecular Function.



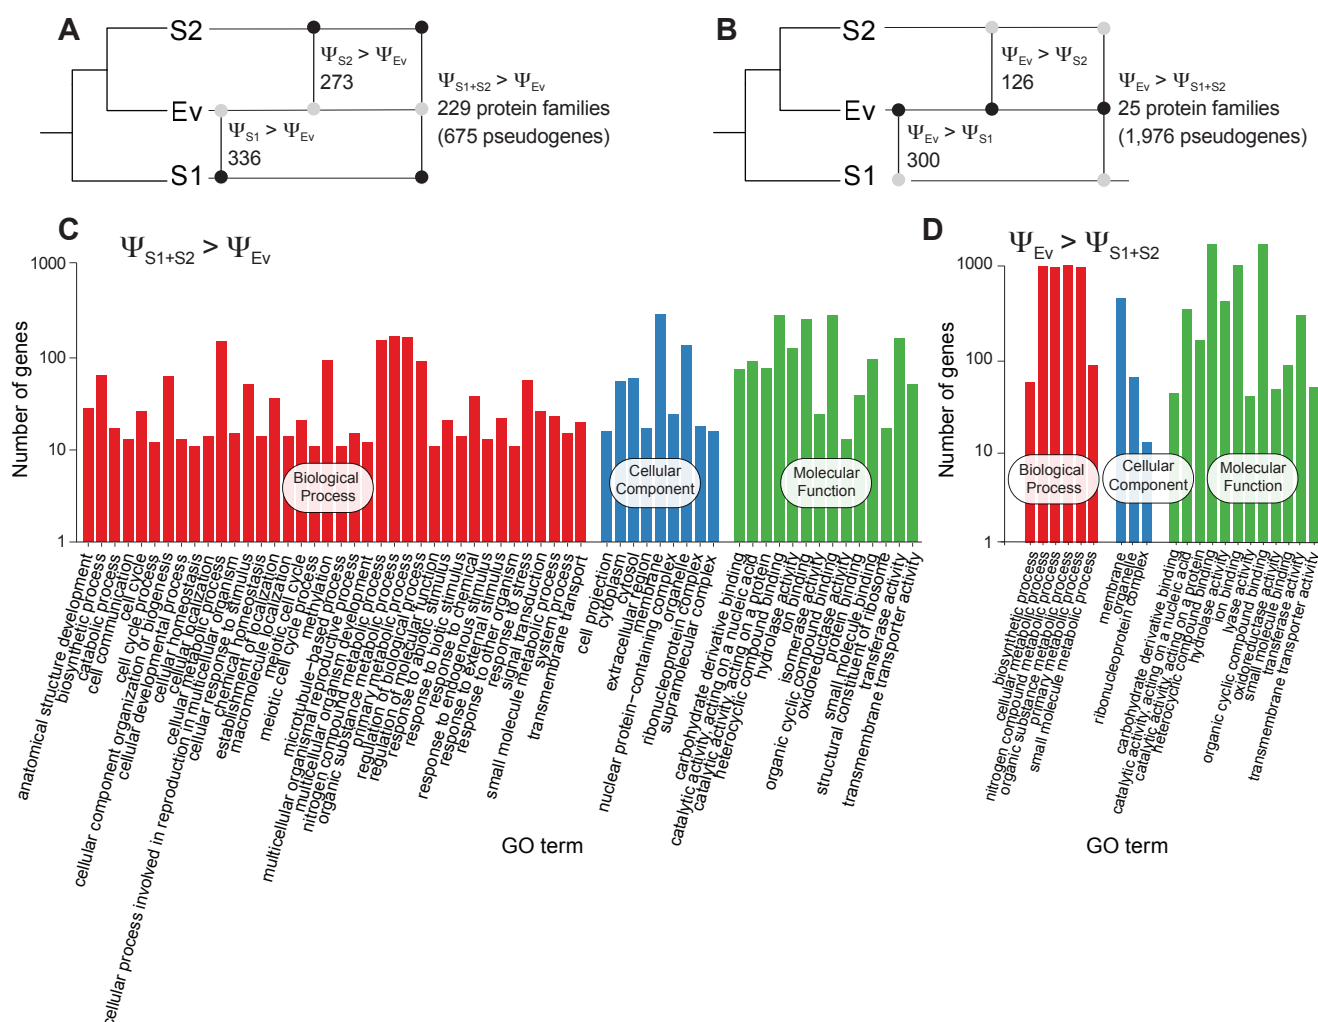

**Figure 4. Pseudogenisation in Symbiodiniaceae.** Number of protein families with significantly different level of pseudogenisation,  $\Psi$ , shown for (A) those with greater extent in symbiotic lineages (i.e., higher  $\Psi$  in S1, S2, or S1+S2, relative to Ev), and (B) those with greater extent in the free-living Ev (i.e., higher  $\Psi$  in Ev relative to S1, S2, or S1+S2). The black circles on the upset plots indicate taxa groups with higher  $\Psi$  than those with grey circles. The associated GO terms are shown for (C) those where  $\Psi_{S1+S2} > \Psi_{Ev}$ , and (D) those where  $\Psi_{Ev} > \Psi_{S1+S2}$ .

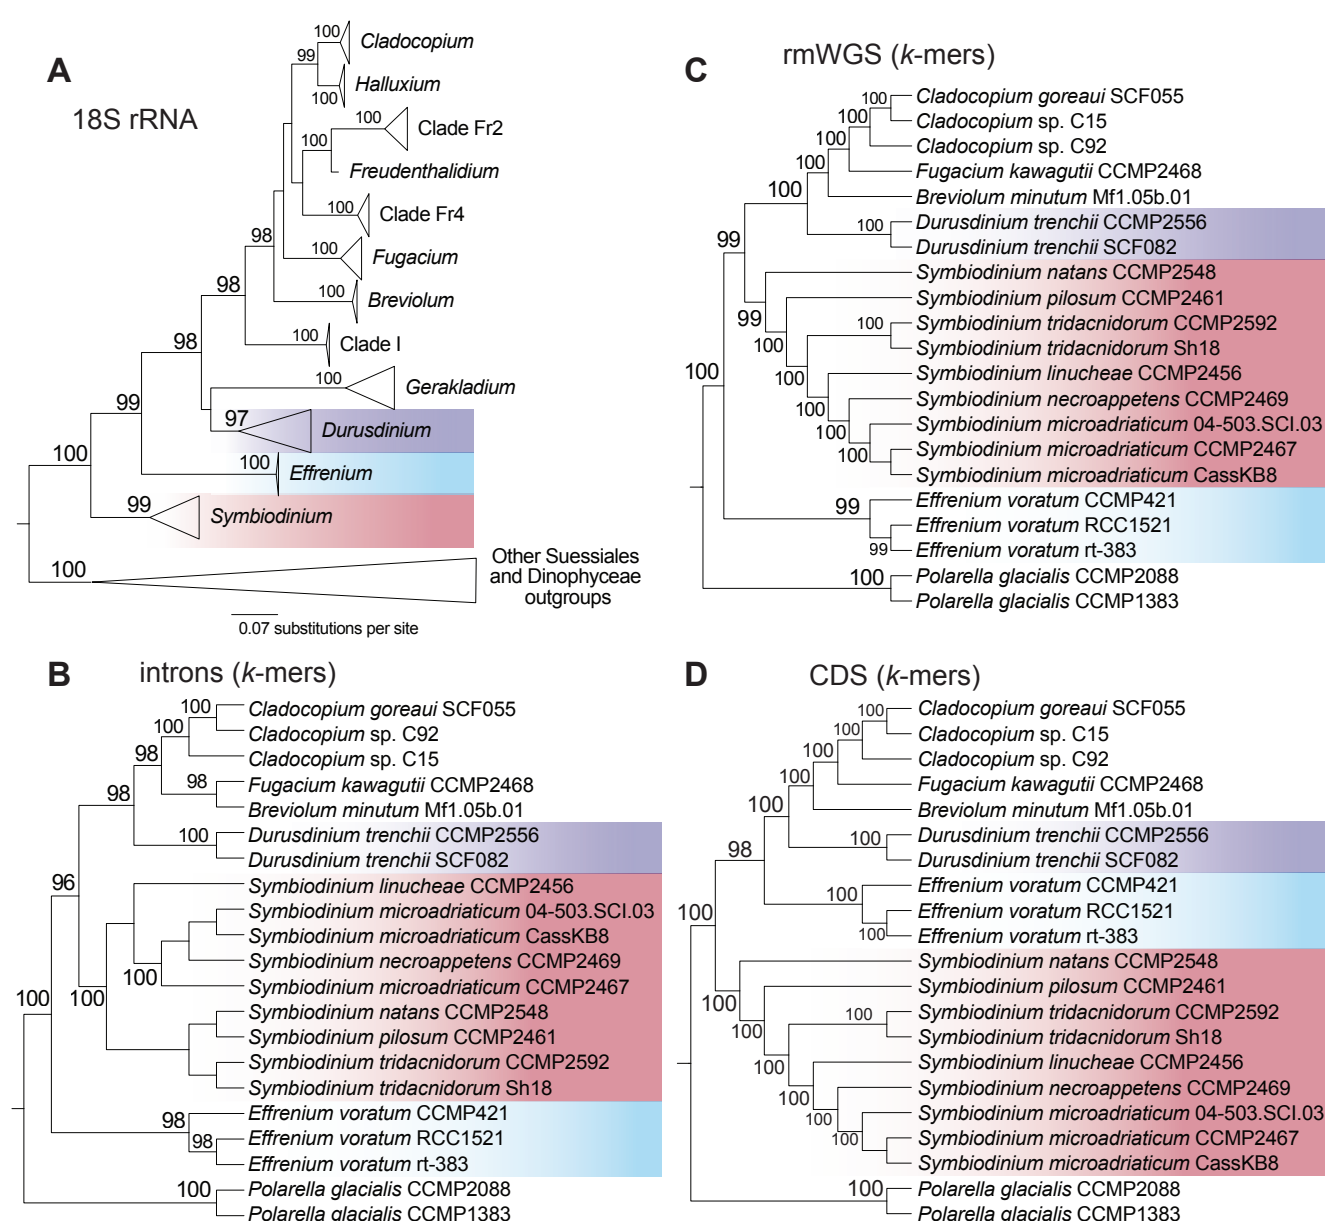

**Figure 5. Phylogenetic relationship of *E. voratum* within Symbiodiniaceae and other taxa.** (A) Maximum likelihood species tree of dinoflagellates inferred based on alignment of 18S rDNA sequences from 13 representative taxa, showing node support derived from ultrafast bootstrap of 2,000 samples; unit of branch length is number of substitutions per site. Tree topologies inferred from  $k$ -mers in 21 Suessiales genomes using our alignment-free (AF) approach are shown for (B) intronic regions ( $k = 21$ ), (C) repeat-masked whole-genome sequences ( $k = 23$ ), and (D) coding sequence regions ( $k = 19$ ). Jackknife support of  $\geq 96\%$  based on 100 pseudo-replicates is shown on each node of the AF trees.

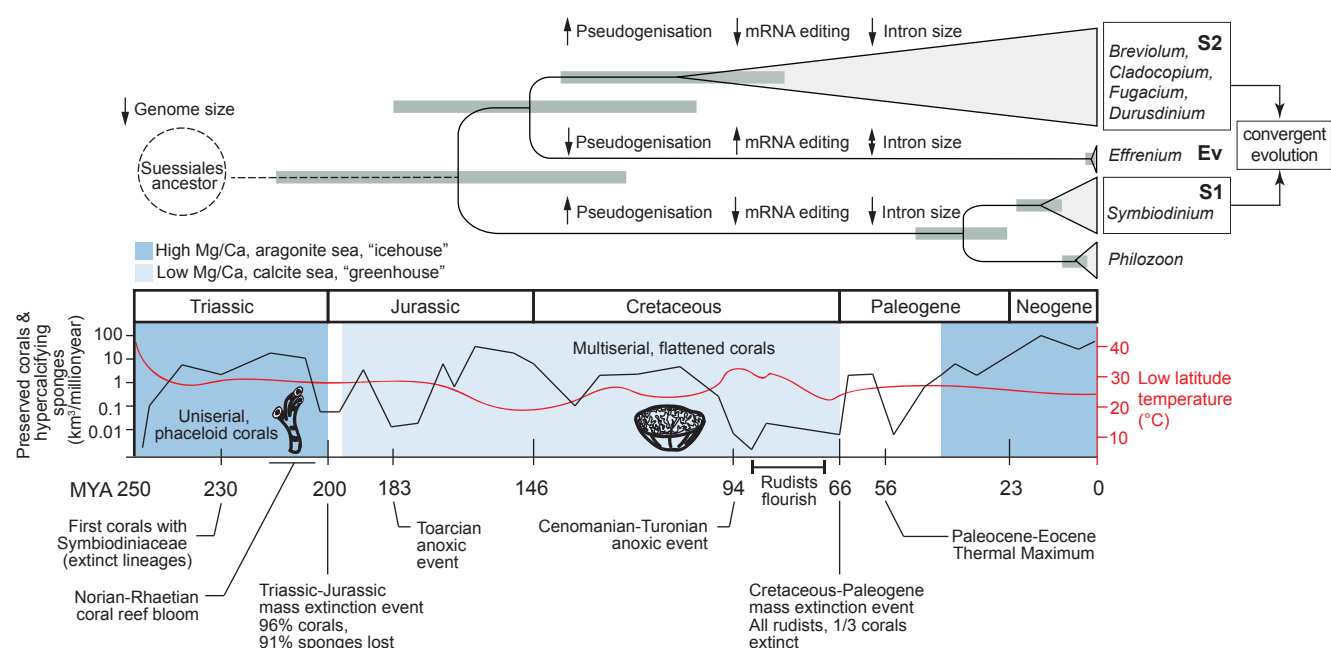

**Figure 6. Timeline of Symbiodiniaceae genome evolution and coral evolution.** The estimated divergence timeline of the Family Symbiodiniaceae (*I*) is shown at the top, indicating representative taxa of S1, Ev, and S2. Grey bars represent 95% confidence intervals of divergence times. Key genome signatures for each group related to pseudogenisation, mRNA editing, and intron size are shown along the branch. The dotted line represents the yet-unknown timeline of Suessiales divergence from the rest of dinoflagellates. Evolutionary timescale along the different eras highlighting key geological events relevant to coral evolution, aligning with Symbiodiniaceae divergence, is shown at the bottom. Mass of preserved corals and sponges represented by black line (left y-axis), low latitude (30°S-30°N) ocean temperature in red (right y-axis), ocean chemistry of Mg/Ca ratio showing aragonite (dark blue) vs calcite sea (light blue); data were sourced from earlier studies (*1, 2, 13-15, 135, 136*).
